# Supplementary material for: Crystal structure, stability and in vitro RNAi activity of oligoribonucleotides containing the ribo-difluorotoluyl nucleotide: insights into substrate requirements by the human RISC Ago2 enzyme
Source: PubMed Central journal article supplement — Nucleic Acids Res. 2007 Sep 18;35(19):6424–38. doi: 10.1093/nar/gkm664 (PMC2095806; doi:10.1093/nar/gkm664), 2007-09-18
Supplement: nar_gkm664_1.pdf [file nar_gkm664_1.pdf]

# **SUPPORTING INFORMATION**

## **Crystal structure, stability and *in vitro* RNAi activity of oligoribonucleotides containing the ribo-difluorotoluy nucleotide: insights into substrate requirements by the human RISC Ago2 enzyme**

Feng Li, Pradeep S. Pallan, Martin A. Maier<sup>1</sup>, Kallanthottathil G. Rajeev<sup>1</sup>, Steven L. Mathieu<sup>2</sup>, Christoph Kreuz<sup>3</sup>, Yupeng Fan<sup>1</sup>, Jayodita Sanghvi<sup>1</sup>, Ronald Micura<sup>3</sup>, Eriks Rozners<sup>2</sup>, Muthiah Manoharan<sup>1</sup> and Martin Egli\*

Department of Biochemistry, School of Medicine, Vanderbilt University, Nashville, TN 37232, USA, <sup>1</sup>Department of Drug Discovery, Alnylam Pharmaceuticals, Inc., 300 Third Street, Cambridge, MA 02142, USA, <sup>2</sup>Department of Chemistry and Chemical Biology, Northeastern University, Boston, MA 02115, USA and <sup>3</sup>Institute of Organic Chemistry, Center for Molecular Biosciences (CMBI), Leopold-Franzens University, 6020 Innsbruck, Austria

\*To whom correspondence should be addressed. Tel: +1 615 343 8070; Fax: +1 615 322 7122; Email: martin.egli@vanderbilt.edu

# FG RNA DUPLEX 1

\*\*\*\*\*  
\*\*\*\*\* CURVES 5.3 R.L. 1998 \*\*\*\*\*  
\*\*\*\*\*

FILE : dftg\_ab.pdb                    LIS : dftg\_ab  
dna :                                 axin :  
axout:                                daf :  
PDB : dftg\_ab\_axis

acc :        0.000    wid :        0.750

maxn :    500    ior :        0    ibond:        0    splin:        3    break:       -1  
nleve:        3    nbac :        7

ends :        F    supp :        T    COMB :        T    DINU :        F    MINI :        T  
rest :        F    line :        F    zaxe :        F    fit :        F    test :        F  
GRV :        T    old :        T    axonl:        F

Strand=        2    Nucleo=        24    Atoms =        508    Units =        24

Input    1) Xdisp=        0.00    Ydisp=        0.00    Incln=        0.00    Tip=        0.00

Combined strands have    12 levels ...

Strand 1 has    12 bases (5'-3'): CGCFAAUUGGCG  
Strand 2 has    12 bases (3'-5'): GCGGUUAAFCGC

FIRST SUM=    135.493    CPTS:        1.837    33.418    9.034    91.204

MINIMISATION: ACC =    0.100E-05    MAXN=    500    NVAR=    48

|      |    |      |         |      |            |
|------|----|------|---------|------|------------|
| STEP | 1  | SUM= | 135.493 | DEL= | 0.000E+00  |
| STEP | 2  | SUM= | 106.510 | DEL= | -0.290E+02 |
| STEP | 3  | SUM= | 88.866  | DEL= | -0.176E+02 |
| STEP | 4  | SUM= | 65.965  | DEL= | -0.229E+02 |
| STEP | 5  | SUM= | 64.832  | DEL= | -0.113E+01 |
| STEP | 6  | SUM= | 54.228  | DEL= | -0.106E+02 |
| STEP | 7  | SUM= | 49.681  | DEL= | -0.455E+01 |
| STEP | 8  | SUM= | 44.617  | DEL= | -0.506E+01 |
| STEP | 9  | SUM= | 38.645  | DEL= | -0.597E+01 |
| STEP | 10 | SUM= | 36.359  | DEL= | -0.229E+01 |
| STEP | 11 | SUM= | 35.030  | DEL= | -0.133E+01 |
| STEP | 12 | SUM= | 33.337  | DEL= | -0.169E+01 |
| STEP | 13 | SUM= | 31.467  | DEL= | -0.187E+01 |
| STEP | 14 | SUM= | 30.761  | DEL= | -0.707E+00 |
| STEP | 15 | SUM= | 29.737  | DEL= | -0.102E+01 |

|      |    |      |        |      |            |
|------|----|------|--------|------|------------|
| STEP | 16 | SUM= | 28.387 | DEL= | -0.135E+01 |
| STEP | 17 | SUM= | 31.503 | DEL= | 0.312E+01  |
| STEP | 18 | SUM= | 28.074 | DEL= | -0.343E+01 |
| STEP | 19 | SUM= | 28.879 | DEL= | 0.805E+00  |
| STEP | 20 | SUM= | 28.005 | DEL= | -0.874E+00 |
| STEP | 21 | SUM= | 27.883 | DEL= | -0.122E+00 |
| STEP | 22 | SUM= | 27.686 | DEL= | -0.197E+00 |
| STEP | 23 | SUM= | 27.248 | DEL= | -0.438E+00 |
| STEP | 24 | SUM= | 26.761 | DEL= | -0.487E+00 |
| STEP | 25 | SUM= | 27.600 | DEL= | 0.839E+00  |
| STEP | 26 | SUM= | 26.630 | DEL= | -0.970E+00 |
| STEP | 27 | SUM= | 26.435 | DEL= | -0.195E+00 |
| STEP | 28 | SUM= | 26.110 | DEL= | -0.325E+00 |
| STEP | 29 | SUM= | 25.571 | DEL= | -0.539E+00 |
| STEP | 30 | SUM= | 25.159 | DEL= | -0.412E+00 |
| STEP | 31 | SUM= | 24.482 | DEL= | -0.677E+00 |
| STEP | 32 | SUM= | 23.714 | DEL= | -0.767E+00 |
| STEP | 33 | SUM= | 23.212 | DEL= | -0.502E+00 |
| STEP | 34 | SUM= | 22.963 | DEL= | -0.249E+00 |
| STEP | 35 | SUM= | 22.794 | DEL= | -0.168E+00 |
| STEP | 36 | SUM= | 22.638 | DEL= | -0.156E+00 |
| STEP | 37 | SUM= | 22.602 | DEL= | -0.361E-01 |
| STEP | 38 | SUM= | 22.562 | DEL= | -0.395E-01 |
| STEP | 39 | SUM= | 22.549 | DEL= | -0.131E-01 |
| STEP | 40 | SUM= | 22.535 | DEL= | -0.138E-01 |
| STEP | 41 | SUM= | 22.522 | DEL= | -0.127E-01 |
| STEP | 42 | SUM= | 22.521 | DEL= | -0.172E-02 |
| STEP | 43 | SUM= | 22.520 | DEL= | -0.607E-03 |
| STEP | 44 | SUM= | 22.520 | DEL= | -0.237E-03 |
| STEP | 45 | SUM= | 22.520 | DEL= | -0.137E-03 |
| STEP | 46 | SUM= | 22.520 | DEL= | -0.984E-04 |
| STEP | 47 | SUM= | 22.520 | DEL= | -0.570E-04 |
| STEP | 48 | SUM= | 22.519 | DEL= | -0.836E-04 |
| STEP | 49 | SUM= | 22.519 | DEL= | -0.813E-04 |
| STEP | 50 | SUM= | 22.519 | DEL= | -0.335E-04 |
| STEP | 51 | SUM= | 22.519 | DEL= | -0.225E-04 |
| STEP | 52 | SUM= | 22.519 | DEL= | -0.611E-05 |
| STEP | 53 | SUM= | 22.519 | DEL= | -0.106E-05 |
| STEP | 54 | SUM= | 22.519 | DEL= | -0.212E-06 |
| STEP | 55 | SUM= | 22.519 | DEL= | -0.940E-07 |
| STEP | 56 | SUM= | 22.519 | DEL= | -0.743E-07 |
| STEP | 57 | SUM= | 22.519 | DEL= | -0.446E-07 |
| STEP | 58 | SUM= | 22.519 | DEL= | -0.209E-07 |
| STEP | 59 | SUM= | 22.519 | DEL= | -0.506E-08 |
| STEP | 60 | SUM= | 22.519 | DEL= | -0.812E-09 |
| STEP | 61 | SUM= | 22.519 | DEL= | -0.976E-10 |
| STEP | 62 | SUM= | 22.519 | DEL= | -0.851E-11 |
| STEP | 63 | SUM= | 22.519 | DEL= | -0.352E-12 |

STEP 64 SUM= 22.519 DEL= -0.142E-13  
 STEP 65 SUM= 22.519 DEL= 0.000E+00

FINAL SUM= 22.519 CPTS: 1.225 18.894 0.586 1.814

GRA=-0.45E-08 0.80E-08 0.16E-08-0.11E-08-0.56E-08-0.21E-08-0.22E-08-0.55E-09  
 GRA=-0.29E-08-0.16E-07-0.30E-10 0.58E-09 0.29E-08-0.74E-08 0.52E-09 0.18E-08  
 GRA= 0.26E-08-0.45E-08 0.15E-08-0.14E-09 0.26E-09 0.21E-07 0.96E-10-0.20E-08  
 GRA= 0.88E-09 0.92E-08-0.32E-08-0.41E-09-0.44E-08-0.97E-08-0.10E-08 0.83E-09  
 GRA=-0.33E-08 0.49E-08 0.16E-08 0.44E-09 0.56E-08-0.14E-07 0.26E-08 0.89E-09  
 GRA= 0.35E-08 0.47E-08 0.16E-08 0.18E-09 0.94E-09 0.22E-08-0.25E-08 0.32E-09

-----  
 |A| Global axis parameters |  
 -----

|        |        |       |        |    |        |         |        |    |       |
|--------|--------|-------|--------|----|--------|---------|--------|----|-------|
| 1) U:  | -0.069 | 0.995 | -0.078 | P: | -0.801 | -13.863 | 15.983 | D: | 0.361 |
| 2) U:  | -0.040 | 0.995 | -0.087 | P: | -1.111 | -11.132 | 15.891 | D: | 0.283 |
| 3) U:  | -0.062 | 0.995 | -0.084 | P: | -1.428 | -8.271  | 15.575 | D: | 4.320 |
| 4) U:  | -0.019 | 0.999 | -0.045 | P: | -1.536 | -5.384  | 15.015 | D: | 4.778 |
| 5) U:  | 0.012  | 0.992 | -0.125 | P: | -1.101 | -3.252  | 14.993 | D: | 0.095 |
| 6) U:  | 0.012  | 0.991 | -0.136 | P: | -0.989 | -0.531  | 14.717 | D: | 0.550 |
| 7) U:  | -0.056 | 0.984 | -0.167 | P: | -1.114 | 2.086   | 14.204 | D: | 0.331 |
| 8) U:  | -0.042 | 0.985 | -0.169 | P: | -1.161 | 4.788   | 13.853 | D: | 5.449 |
| 9) U:  | -0.081 | 0.989 | -0.125 | P: | -1.665 | 6.804   | 13.339 | D: | 5.307 |
| 10) U: | -0.016 | 0.987 | -0.163 | P: | -1.525 | 9.842   | 12.692 | D: | 0.238 |
| 11) U: | -0.019 | 0.991 | -0.135 | P: | -1.424 | 12.557  | 12.332 | D: | 0.808 |
| 12) U: | -0.005 | 0.995 | -0.104 | P: | -1.446 | 15.150  | 12.315 |    |       |

-----  
 |B| Global Base-Axis Parameters |  
 -----

| 1st strand   |    | Xdisp<br>(dx) | Ydisp<br>(dy) | Inclin<br>(eta) | Tip<br>(theta) | Bc | Tc  |
|--------------|----|---------------|---------------|-----------------|----------------|----|-----|
| 1) CT        | 1  | -4.22         | 0.08          | 16.38           | -2.18          | 3  | 0   |
| 2) GA        | 2  | -4.49         | -0.19         | 14.78           | -3.01          | 1  | 13  |
| 3) CT        | 3  | -4.38         | -0.11         | 16.79           | -3.53          | 3  | -7  |
| 4) <b>FY</b> | 4  | -2.81         | 0.23          | 15.70           | -10.79         | 4  | -27 |
| 5) AE        | 5  | -4.44         | -0.17         | 19.61           | -7.19          | 2  | 28  |
| 6) AE        | 6  | -4.49         | -0.11         | 20.50           | -8.70          | 2  | 24  |
| 7) UI        | 7  | -4.31         | 0.06          | 15.18           | -10.70         | 4  | -24 |
| 8) UI        | 8  | -4.37         | 0.22          | 15.19           | -8.24          | 4  | -26 |
| 9) GA        | 9  | -5.67         | 0.02          | 19.73           | -10.12         | 1  | 11  |
| 10) GA       | 10 | -4.37         | 0.00          | 15.24           | -9.96          | 1  | 5   |
| 11) CT       | 11 | -4.11         | 0.16          | 13.70           | -12.09         | 3  | -13 |
| 12) GA       | 12 | -4.35         | -0.07         | 12.97           | -7.89          | 1  | 0   |

| 2nd strand   |    |  | Xdisp<br>(dx) | Ydisp<br>(dy) | Inclin<br>(eta) | Tip<br>(theta) | Bc | Tc  |
|--------------|----|--|---------------|---------------|-----------------|----------------|----|-----|
| 1) GA        | 24 |  | -4.32         | 0.15          | 10.13           | -11.01         | 1  | 0   |
| 2) CT        | 23 |  | -4.23         | 0.26          | 12.34           | -12.32         | 3  | -13 |
| 3) GA        | 22 |  | -4.49         | 0.23          | 11.70           | -9.26          | 1  | 5   |
| 4) GA        | 21 |  | -5.56         | 0.28          | 14.77           | -12.71         | 1  | 11  |
| 5) UI        | 20 |  | -4.42         | 0.38          | 14.85           | -11.87         | 4  | -26 |
| 6) UI        | 19 |  | -4.51         | 0.28          | 17.13           | -11.30         | 4  | -24 |
| 7) AE        | 18 |  | -4.36         | 0.48          | 22.94           | -14.31         | 2  | 24  |
| 8) AE        | 17 |  | -4.36         | 0.07          | 21.30           | -8.60          | 2  | 28  |
| 9) <b>FY</b> | 16 |  | -2.63         | 0.30          | 14.97           | -12.13         | 4  | -27 |
| 10) CT       | 15 |  | -4.35         | -0.13         | 17.63           | -7.03          | 3  | -7  |
| 11) GA       | 14 |  | -4.57         | 0.01          | 18.05           | -7.38          | 1  | 13  |
| 12) CT       | 13 |  | -4.14         | 0.31          | 17.86           | -3.72          | 3  | 0   |

-----  
|C| Global Base pair-Axis Parameters |  
-----

Strand 1 with strand 2 ...

| Duplex      |             |    | Xdisp<br>(dx) | Ydisp<br>(dy) | Inclin<br>(eta) | Tip<br>(theta) | Bc | Tc  |
|-------------|-------------|----|---------------|---------------|-----------------|----------------|----|-----|
| 1) C        | 1-G         | 24 | -4.27         | -0.03         | 13.26           | 4.41           | 3  | 0   |
| 2) G        | 2-C         | 23 | -4.36         | -0.22         | 13.56           | 4.65           | 1  | 13  |
| 3) C        | 3-G         | 22 | -4.44         | -0.17         | 14.25           | 2.87           | 3  | -7  |
| 4) <b>F</b> | 4-G         | 21 | -4.18         | -0.02         | 15.23           | 0.96           | 4  | -27 |
| 5) A        | 5-U         | 20 | -4.43         | -0.27         | 17.23           | 2.34           | 2  | 28  |
| 6) A        | 6-U         | 19 | -4.50         | -0.20         | 18.81           | 1.30           | 2  | 24  |
| 7) U        | 7-A         | 18 | -4.33         | -0.21         | 19.06           | 1.81           | 4  | -24 |
| 8) U        | 8-A         | 17 | -4.37         | 0.07          | 18.24           | 0.18           | 4  | -26 |
| 9) G        | 9- <b>F</b> | 16 | -4.15         | -0.14         | 17.35           | 1.01           | 1  | 11  |
| 10) G       | 10-C        | 15 | -4.36         | 0.07          | 16.43           | -1.47          | 1  | 5   |
| 11) C       | 11-G        | 14 | -4.34         | 0.07          | 15.87           | -2.36          | 3  | -13 |
| 12) G       | 12-C        | 13 | -4.24         | -0.19         | 15.42           | -2.09          | 1  | 0   |
| Average:    |             |    | -4.33         | -0.10         | 16.23           | 1.13           |    |     |

-----  
|D| Global Base-Base Parameters |  
-----

Strand 1 with strand 2 ...

| Duplex | Shear | Stretch | Stagger | Buckle | Propel | Opening | Bc | Tc |
|--------|-------|---------|---------|--------|--------|---------|----|----|
|--------|-------|---------|---------|--------|--------|---------|----|----|

|          |          |             | (Sx) | (Sy)  | (Sz)  | (kappa) | (omega) | (sigma) |       |       |
|----------|----------|-------------|------|-------|-------|---------|---------|---------|-------|-------|
| 1)       | C        | 1-G         | 24   | 0.10  | 0.23  | -0.16   | 6.25    | -13.19  | 1.61  | 3 0   |
| 2)       | G        | 2-C         | 23   | -0.26 | 0.07  | 0.03    | 2.44    | -15.33  | 0.69  | 1 13  |
| 3)       | C        | 3-G         | 22   | 0.11  | 0.12  | -0.08   | 5.09    | -12.79  | 0.52  | 3 -7  |
| 4)       | <b>F</b> | 4-G         | 21   | 2.75  | 0.52  | -0.30   | 0.93    | -23.50  | 7.69  | 4 -27 |
| 5)       | A        | 5-U         | 20   | -0.02 | 0.21  | -0.03   | 4.76    | -19.07  | 3.32  | 2 28  |
| 6)       | A        | 6-U         | 19   | 0.02  | 0.17  | -0.22   | 3.37    | -20.00  | 1.20  | 2 24  |
| 7)       | U        | 7-A         | 18   | 0.06  | 0.54  | -0.11   | -7.76   | -25.01  | 6.29  | 4 -24 |
| 8)       | U        | 8-A         | 17   | 0.00  | 0.29  | 0.16    | -6.11   | -16.84  | 4.10  | 4 -26 |
| 9)       | G        | 9- <b>F</b> | 16   | -3.04 | 0.32  | -0.24   | 4.76    | -22.24  | 6.01  | 1 11  |
| 10)      | G        | 10-C        | 15   | -0.02 | -0.12 | -0.07   | -2.39   | -16.99  | -2.33 | 1 5   |
| 11)      | C        | 11-G        | 14   | 0.45  | 0.16  | -0.18   | -4.35   | -19.47  | 1.64  | 3 -13 |
| 12)      | G        | 12-C        | 13   | -0.21 | 0.24  | -0.08   | -4.89   | -11.61  | 2.07  | 1 0   |
| Average: |          |             |      | -0.01 | 0.23  | -0.11   | 0.18    | -18.00  | 2.73  |       |

-----  
|E| Global Inter-Base Parameters |  
-----

| 1st strand |          |              | Shift<br>(Dx) | Slide<br>(Dy) | Rise<br>(Dz) | Tilt<br>(tau) | Roll<br>(rho) | Twist<br>(Omega) | Dc       |
|------------|----------|--------------|---------------|---------------|--------------|---------------|---------------|------------------|----------|
| 2)         | C        | 1/G          | 2             | -0.40         | -0.43        | 2.84          | -2.39         | 0.73             | 32.58 8  |
| 3)         | G        | 2/C          | 3             | -0.02         | 0.21         | 2.83          | 1.67          | -1.78            | 33.82 5  |
| 4)         | C        | 3/ <b>F</b>  | 4             | 1.90          | 0.52         | 2.81          | 2.18          | -7.96            | 45.36 -3 |
| 5)         | <b>F</b> | 4/A          | 5             | -1.83         | -0.83        | 2.26          | 5.99          | 8.08             | 22.37 10 |
| 6)         | A        | 5/A          | 6             | -0.16         | 0.04         | 2.64          | 1.20          | -0.97            | 32.31 4  |
| 7)         | A        | 6/U          | 7             | 0.29          | 0.10         | 2.72          | -5.21         | 2.30             | 37.21 7  |
| 8)         | U        | 7/U          | 8             | -0.13         | 0.28         | 2.85          | -0.03         | 1.64             | 34.01 -4 |
| 9)         | U        | 8/G          | 9             | -1.14         | -0.61        | 1.90          | 4.01          | 1.47             | 22.60 -9 |
| 10)        | G        | 9/G          | 10            | 1.02          | 0.21         | 3.18          | -7.41         | -3.00            | 40.25 1  |
| 11)        | G        | 10/C         | 11            | 0.36          | 0.27         | 2.68          | -0.76         | -0.70            | 37.64 5  |
| 12)        | C        | 11/G         | 12            | -0.07         | -0.46        | 2.62          | 0.34          | 5.81             | 32.77 8  |
|            |          |              |               |               |              |               |               |                  |          |
| 2nd strand |          |              | Shift<br>(Dx) | Slide<br>(Dy) | Rise<br>(Dz) | Tilt<br>(tau) | Roll<br>(rho) | Twist<br>(Omega) | Dc       |
| 2)         | G        | 24/C         | 23            | -0.04         | 0.27         | 2.65          | 1.42          | -2.87            | 33.51 8  |
| 3)         | C        | 23/G         | 22            | -0.39         | -0.15        | 2.94          | -0.98         | 4.33             | 33.99 5  |
| 4)         | G        | 22/G         | 21            | -0.74         | -0.12        | 3.03          | 6.33          | -2.75            | 38.20 1  |
| 5)         | G        | 21/U         | 20            | 0.95          | 0.52         | 1.99          | 2.16          | -3.65            | 26.74 -9 |
| 6)         | U        | 20/U         | 19            | -0.20         | -0.08        | 2.83          | 2.59          | 0.03             | 34.43 -4 |
| 7)         | U        | 19/A         | 18            | 0.25          | 0.28         | 2.61          | 5.92          | -7.31            | 32.12 7  |
| 8)         | A        | 18/A         | 17            | -0.07         | -0.53        | 2.59          | -1.68         | 6.53             | 36.20 4  |
| 9)         | A        | 17/ <b>F</b> | 16            | 1.89          | 0.64         | 2.30          | -6.86         | -6.87            | 20.70 10 |
| 10)        | <b>F</b> | 16/C         | 15            | -2.00         | -0.65        | 3.00          | -0.26         | 8.26             | 48.59 -3 |

|               |       |      |      |      |       |       |   |
|---------------|-------|------|------|------|-------|-------|---|
| 11) C 15/G 14 | -0.11 | 0.02 | 2.79 | 1.20 | -1.78 | 33.68 | 5 |
| 12) G 14/C 13 | 0.59  | 0.54 | 2.53 | 0.88 | 2.05  | 32.34 | 8 |

-----  
|F| Global Inter-Base pair Parameters |  
-----

Strand 1 with strand 2 ...

| Duplex        | Shift<br>(Dx) | Slide<br>(Dy) | Rise<br>(Dz) | Tilt<br>(tau) | Roll<br>(rho) | Twist<br>(Omega) | Dc |
|---------------|---------------|---------------|--------------|---------------|---------------|------------------|----|
| 2) C 1/G 2    | -0.22         | -0.35         | 2.74         | -0.48         | 1.80          | 33.05            | 8  |
| 3) G 2/C 3    | -0.21         | 0.18          | 2.89         | 0.35          | -3.05         | 33.91            | 5  |
| 4) C 3/F 4    | 0.58          | 0.32          | 2.92         | 4.26          | -2.61         | 41.78            | -3 |
| 5) F 4/A 5    | -0.44         | -0.68         | 2.13         | 4.07          | 5.86          | 24.56            | 10 |
| 6) A 5/A 6    | -0.18         | 0.06          | 2.73         | 1.89          | -0.50         | 33.37            | 4  |
| 7) A 6/U 7    | 0.27          | -0.09         | 2.67         | 0.35          | 4.80          | 34.67            | 7  |
| 8) U 7/U 8    | -0.10         | 0.41          | 2.72         | -0.86         | -2.45         | 35.11            | -4 |
| 9) U 8/G 9    | 0.37          | -0.62         | 2.10         | -1.43         | 4.17          | 21.65            | -9 |
| 10) G 9/G 10  | -0.49         | 0.43          | 3.09         | -3.83         | -5.63         | 44.42            | 1  |
| 11) G 10/C 11 | 0.12          | 0.13          | 2.74         | 0.22          | 0.54          | 35.66            | 5  |
| 12) C 11/G 12 | 0.26          | -0.50         | 2.58         | 0.61          | 1.88          | 32.56            | 8  |
| Average:      | 0.00          | -0.07         | 2.66         | 0.47          | 0.44          | 33.70            |    |

-----  
|G| Local Inter-Base Parameters |  
-----

| 1st strand    | Shift<br>(Dx) | Slide<br>(Dy) | Rise<br>(Dz) | Tilt<br>(tau) | Roll<br>(rho) | Twist<br>(Omega) | Dc |
|---------------|---------------|---------------|--------------|---------------|---------------|------------------|----|
| 2) C 1/G 2    | -0.19         | -2.00         | 3.62         | -0.93         | 9.36          | 31.10            | 8  |
| 3) G 2/C 3    | 0.22          | -1.57         | 3.27         | 3.44          | 7.36          | 32.80            | 5  |
| 4) C 3/F 4    | 2.12          | -1.41         | 3.09         | 7.55          | 4.84          | 43.16            | -3 |
| 5) F 4/A 5    | -1.36         | -1.38         | 3.34         | 9.30          | 14.42         | 18.93            | 10 |
| 6) A 5/A 6    | 0.36          | -1.42         | 3.34         | 5.32          | 9.99          | 29.79            | 4  |
| 7) A 6/U 7    | 0.93          | -1.69         | 3.63         | 0.93          | 13.41         | 34.55            | 7  |
| 8) U 7/U 8    | 0.32          | -1.51         | 3.27         | 5.33          | 10.34         | 32.74            | -4 |
| 9) U 8/G 9    | -0.74         | -1.81         | 3.01         | 7.31          | 8.09          | 19.68            | -9 |
| 10) G 9/G 10  | 1.58          | -2.29         | 3.49         | -0.36         | 9.03          | 40.12            | 1  |
| 11) G 10/C 11 | 0.90          | -1.72         | 3.20         | 6.15          | 8.60          | 35.63            | 5  |
| 12) C 11/G 12 | 0.46          | -2.20         | 3.27         | 5.86          | 13.04         | 31.17            | 8  |
| 2nd strand    | Shift<br>(Dx) | Slide<br>(Dy) | Rise<br>(Dz) | Tilt<br>(tau) | Roll<br>(rho) | Twist<br>(Omega) | Dc |

|     |   |      |    |       |       |      |        |       |       |    |
|-----|---|------|----|-------|-------|------|--------|-------|-------|----|
| 2)  | G | 24/C | 23 | -0.56 | -2.18 | 3.18 | -5.24  | 9.22  | 32.26 | 8  |
| 3)  | C | 23/G | 22 | -0.82 | -1.75 | 3.20 | -7.12  | 2.80  | 32.78 | 5  |
| 4)  | G | 22/G | 21 | -1.19 | -2.47 | 3.40 | -0.92  | 11.28 | 38.00 | 1  |
| 5)  | G | 21/U | 20 | 0.44  | -2.15 | 3.18 | -3.34  | 10.39 | 24.58 | -9 |
| 6)  | U | 20/U | 19 | -0.69 | -1.72 | 3.40 | -4.12  | 9.32  | 32.86 | -4 |
| 7)  | U | 19/A | 18 | -0.38 | -1.62 | 3.71 | -0.88  | 17.84 | 29.49 | 7  |
| 8)  | A | 18/A | 17 | -0.49 | -1.10 | 3.15 | -8.18  | 7.19  | 32.91 | 4  |
| 9)  | A | 17/F | 16 | 1.42  | -1.03 | 3.27 | -10.27 | 12.98 | 17.22 | 10 |
| 10) | F | 16/C | 15 | -2.30 | -1.40 | 3.03 | -8.13  | 5.48  | 46.87 | -3 |
| 11) | C | 15/G | 14 | -0.56 | -1.63 | 3.51 | -2.76  | 11.88 | 31.64 | 5  |
| 12) | G | 14/C | 13 | 0.35  | -2.00 | 3.48 | -2.04  | 7.87  | 30.22 | 8  |

-----  
|H| Local Inter-Base pair Parameters |  
-----

Strand 1 with strand 2 ...

| Duplex   | Shift<br>(Dx) | Slide<br>(Dy) | Rise<br>(Dz) | Tilt<br>(tau) | Roll<br>(rho) | Twist<br>(Omega) | Dc    |       |       |    |
|----------|---------------|---------------|--------------|---------------|---------------|------------------|-------|-------|-------|----|
| 2)       | C             | 1/G           | 2            | -0.39         | -2.09         | 3.40             | -3.11 | 9.31  | 31.89 | 8  |
| 3)       | G             | 2/C           | 3            | -0.30         | -1.66         | 3.27             | -1.88 | 5.12  | 33.06 | 5  |
| 4)       | C             | 3/F           | 4            | 0.47          | -1.87         | 3.48             | 3.49  | 8.23  | 40.91 | -3 |
| 5)       | F             | 4/A           | 5            | -0.47         | -1.81         | 3.08             | 2.90  | 12.72 | 22.10 | 10 |
| 6)       | A             | 5/A           | 6            | -0.15         | -1.55         | 3.41             | 0.60  | 9.77  | 31.73 | 4  |
| 7)       | A             | 6/U           | 7            | 0.27          | -1.63         | 3.74             | 0.11  | 15.65 | 32.63 | 7  |
| 8)       | U             | 7/U           | 8            | -0.10         | -1.28         | 3.24             | -1.52 | 9.09  | 33.08 | -4 |
| 9)       | U             | 8/G           | 9            | 0.37          | -1.47         | 2.95             | -1.36 | 10.94 | 18.65 | -9 |
| 10)      | G             | 9/G           | 10           | -0.38         | -1.81         | 3.54             | -4.34 | 7.31  | 44.12 | 1  |
| 11)      | G             | 10/C          | 11           | 0.18          | -1.68         | 3.43             | 1.72  | 10.23 | 34.09 | 5  |
| 12)      | C             | 11/G          | 12           | 0.41          | -2.10         | 3.36             | 1.86  | 10.53 | 30.80 | 8  |
| Average: |               |               |              | -0.01         | -1.72         | 3.35             | -0.14 | 9.90  | 32.10 |    |

-----  
|I| Global Axis Curvature |  
-----

| Duplex | Ax | Ay  | Ainc | Atip  | Adis  | Angle | Path  | Dc   |      |      |    |
|--------|----|-----|------|-------|-------|-------|-------|------|------|------|----|
| 2)     | C  | 1/G | 2    | -0.13 | -0.16 | -0.79 | 1.56  | 0.21 | 1.75 | 2.75 | 8  |
| 3)     | G  | 2/C | 3    | -0.13 | 0.13  | -0.34 | -1.27 | 0.18 | 1.31 | 2.90 | 5  |
| 4)     | C  | 3/F | 4    | 0.33  | 0.17  | 3.27  | -0.70 | 0.37 | 3.34 | 2.94 | -3 |
| 5)     | F  | 4/A | 5    | -0.19 | -0.43 | 2.08  | 4.49  | 0.47 | 4.95 | 2.18 | 10 |
| 6)     | A  | 5/A | 6    | -0.11 | -0.02 | 0.31  | 0.54  | 0.11 | 0.62 | 2.74 | 4  |
| 7)     | A  | 6/U | 7    | 0.10  | -0.07 | 0.11  | 4.30  | 0.13 | 4.30 | 2.67 | 7  |
| 8)     | U  | 7/U | 8    | -0.06 | 0.12  | -0.04 | -0.82 | 0.14 | 0.82 | 2.73 | -4 |



|     |   |      |    |       |       |       |       |      |      |      |    |
|-----|---|------|----|-------|-------|-------|-------|------|------|------|----|
| 9)  | U | 8/G  | 9  | 0.15  | -0.40 | -0.54 | 3.34  | 0.43 | 3.38 | 2.14 | -9 |
| 10) | G | 9/G  | 10 | -0.28 | 0.22  | -2.91 | -3.16 | 0.35 | 4.30 | 3.11 | 1  |
| 11) | G | 10/C | 11 | 0.10  | 0.12  | 0.78  | 1.43  | 0.16 | 1.63 | 2.74 | 5  |
| 12) | C | 11/G | 12 | 0.17  | -0.24 | 1.07  | 1.61  | 0.29 | 1.93 | 2.59 | 8  |

Overall axis bend ... UU= 3.93 PP= 6.15

| Duplex   | Offset | L.Dir   | ... wrt end-to-end vector |  |  |  |  |  |  |  |  |
|----------|--------|---------|---------------------------|--|--|--|--|--|--|--|--|
| 1) C 1   | 0.00   | 0.00    |                           |  |  |  |  |  |  |  |  |
| 2) G 2   | 0.35   | 39.34   |                           |  |  |  |  |  |  |  |  |
| 3) C 3   | 0.58   | -9.15   |                           |  |  |  |  |  |  |  |  |
| 4) F 4   | 0.56   | -74.41  |                           |  |  |  |  |  |  |  |  |
| 5) A 5   | 0.35   | -28.07  |                           |  |  |  |  |  |  |  |  |
| 6) A 6   | 0.43   | -35.43  |                           |  |  |  |  |  |  |  |  |
| 7) U 7   | 0.24   | -77.14  |                           |  |  |  |  |  |  |  |  |
| 8) U 8   | 0.23   | -107.61 |                           |  |  |  |  |  |  |  |  |
| 9) G 9   | 0.41   | 121.86  |                           |  |  |  |  |  |  |  |  |
| 10) G 10 | 0.35   | 29.82   |                           |  |  |  |  |  |  |  |  |
| 11) C 11 | 0.31   | -35.40  |                           |  |  |  |  |  |  |  |  |
| 12) G 12 | 0.00   | 0.00    |                           |  |  |  |  |  |  |  |  |

Path length= 29.48 End-to-end= 29.25 Shortening= 0.78 %

-----  
|J| Backbone Parameters |  
-----

| 1st strand |    | C1'-C2' | C2'-C3' | Phase | Ampli | Pucker   | C1'   | C2'   | C3'   |
|------------|----|---------|---------|-------|-------|----------|-------|-------|-------|
| 1)CT       | 1  | -33.34  | 44.45   | 8.54  | 45.76 | C3'-endo | 105.7 | 100.5 | 99.7  |
| 2)GA       | 2  | -36.19  | 47.32   | 7.32  | 48.87 | C3'-endo | 109.2 | 98.2  | 100.0 |
| 3)CT       | 3  | -26.98  | 39.62   | 13.82 | 41.22 | C3'-endo | 106.4 | 101.4 | 101.7 |
| 4)FY       | 4  | -29.25  | 42.81   | 13.82 | 44.78 | C3'-endo | 105.7 | 99.8  | 101.4 |
| 5)AE       | 5  | -35.77  | 45.95   | 5.62  | 47.10 | C3'-endo | 107.2 | 98.9  | 100.3 |
| 6)AE       | 6  | -36.57  | 48.03   | 7.94  | 49.43 | C3'-endo | 105.9 | 99.4  | 98.7  |
| 7)UI       | 7  | -31.65  | 45.56   | 13.54 | 47.49 | C3'-endo | 105.6 | 100.9 | 99.1  |
| 8)UI       | 8  | -31.86  | 44.52   | 10.19 | 45.65 | C3'-endo | 105.7 | 100.2 | 101.1 |
| 9)GA       | 9  | -32.72  | 45.32   | 10.30 | 46.75 | C3'-endo | 106.6 | 99.0  | 100.9 |
| 10)GA      | 10 | -30.41  | 43.36   | 12.10 | 45.35 | C3'-endo | 108.1 | 98.0  | 102.1 |
| 11)CT      | 11 | -30.50  | 45.31   | 15.17 | 47.56 | C3'-endo | 104.7 | 100.5 | 99.2  |
| 12)GA      | 12 | -24.82  | 40.37   | 20.30 | 43.77 | C3'-endo | 107.2 | 101.1 | 101.2 |

| Torsions |   | Chi     | Gamma   | Delta   | Epsil   | Zeta   | Alpha  | Beta    |
|----------|---|---------|---------|---------|---------|--------|--------|---------|
|          |   | C1'-N   | C5'-C4' | C4'-C3' | C3'-O3' | O3'-P  | P-O5'  | O5'-C5' |
| 1)CT     | 1 | -165.15 | 59.60   | 80.30   | -155.37 | -70.55 | -67.88 | 177.20  |

|       |    |         |       |       |         |        |        |         |
|-------|----|---------|-------|-------|---------|--------|--------|---------|
| 2)GA  | 2  | -157.88 | 53.11 | 83.11 | -147.49 | -77.37 | -62.56 | 167.19  |
| 3)CT  | 3  | -162.08 | 53.54 | 80.54 | -150.81 | -62.00 | -65.75 | 167.27  |
| 4)FY  | 4  | -157.31 | 51.79 | 79.53 | -149.71 | -82.91 | -67.36 | 169.30  |
| 5)AE  | 5  | -150.98 | 53.41 | 77.76 | -156.52 | -68.98 | -68.86 | 172.24  |
| 6)AE  | 6  | -154.12 | 54.95 | 79.94 | -153.05 | -68.43 | -68.17 | 172.94  |
| 7)UI  | 7  | -158.98 | 55.12 | 78.02 | -154.18 | -73.96 | -61.81 | 170.60  |
| 8)UI  | 8  | -158.35 | 48.54 | 75.20 | -150.81 | -74.88 | -65.17 | 164.85  |
| 9)GA  | 9  | -162.70 | 57.17 | 76.08 | -151.00 | -63.13 | -67.03 | 173.61  |
| 10)GA | 10 | -164.95 | 58.70 | 76.29 | -138.66 | -75.32 | -66.08 | 165.42  |
| 11)CT | 11 | -163.84 | 51.71 | 80.19 | -155.18 | -67.22 | -66.40 | -178.14 |
| 12)GA | 12 | -156.17 | 51.84 | 78.05 | .....   | .....  | .....  | .....   |

| 2nd strand |    | C1'-C2' | C2'-C3' | Phase | Ampli | Pucker   | C1'   | C2'   | C3'   |
|------------|----|---------|---------|-------|-------|----------|-------|-------|-------|
| 1)GA       | 24 | -27.28  | 40.02   | 14.10 | 42.00 | C3'-endo | 108.4 | 100.5 | 101.9 |
| 2)CT       | 23 | -33.16  | 44.88   | 9.16  | 46.30 | C3'-endo | 106.2 | 99.5  | 100.5 |
| 3)GA       | 22 | -27.52  | 41.01   | 15.44 | 43.24 | C3'-endo | 105.5 | 101.1 | 100.3 |
| 4)GA       | 21 | -34.04  | 46.81   | 11.05 | 48.84 | C3'-endo | 104.8 | 99.9  | 97.1  |
| 5)UI       | 20 | -34.08  | 49.36   | 14.45 | 52.32 | C3'-endo | 108.0 | 97.2  | 98.3  |
| 6)UI       | 19 | -27.68  | 42.05   | 16.37 | 44.70 | C3'-endo | 108.1 | 98.9  | 102.1 |
| 7)AE       | 18 | -33.81  | 44.86   | 8.96  | 46.64 | C3'-endo | 106.3 | 99.8  | 98.8  |
| 8)AE       | 17 | -34.41  | 44.11   | 5.52  | 45.33 | C3'-endo | 107.3 | 99.8  | 100.1 |
| 9)FY       | 16 | -30.68  | 44.10   | 12.31 | 45.41 | C3'-endo | 103.6 | 101.9 | 100.1 |
| 10)CT      | 15 | -31.49  | 43.41   | 10.55 | 44.96 | C3'-endo | 107.5 | 100.3 | 100.1 |
| 11)GA      | 14 | -32.90  | 43.98   | 9.06  | 45.86 | C3'-endo | 108.6 | 98.2  | 100.6 |
| 12)CT      | 13 | -32.79  | 42.47   | 5.59  | 43.43 | C3'-endo | 106.0 | 100.2 | 101.1 |

| Torsions |    | Chi<br>C1'-N | Gamma<br>C5'-C4' | Delta<br>C4'-C3' | Epsil<br>C3'-O3' | Zeta<br>O3'-P | Alpha<br>P-O5' | Beta<br>O5'-C5' |
|----------|----|--------------|------------------|------------------|------------------|---------------|----------------|-----------------|
| 1)GA     | 24 | -157.69      | 54.08            | 80.21            | .....            | .....         | .....          | .....           |
| 2)CT     | 23 | -163.17      | 53.20            | 80.72            | -154.54          | -65.51        | -66.14         | 179.34          |
| 3)GA     | 22 | -165.24      | 51.66            | 76.54            | -147.30          | -75.30        | -60.97         | 165.31          |
| 4)GA     | 21 | -166.91      | 59.49            | 72.21            | -153.27          | -63.53        | -65.30         | -178.45         |
| 5)UI     | 20 | -159.12      | 47.93            | 78.54            | -161.41          | -70.67        | -72.77         | 170.23          |
| 6)UI     | 19 | -158.97      | 51.43            | 80.10            | -150.89          | -70.67        | -66.05         | 170.12          |
| 7)AE     | 18 | -153.00      | 52.36            | 79.79            | -151.17          | -70.24        | -67.50         | 173.67          |
| 8)AE     | 17 | -151.91      | 59.35            | 76.88            | -158.20          | -67.77        | -68.64         | 172.95          |
| 9)FY     | 16 | -157.25      | 49.40            | 77.61            | -147.07          | -86.12        | -65.67         | 161.05          |
| 10)CT    | 15 | -160.92      | 54.85            | 82.73            | -152.02          | -64.80        | -65.62         | 170.39          |
| 11)GA    | 14 | -158.14      | 52.48            | 76.15            | -143.06          | -76.49        | -61.72         | 163.33          |
| 12)CT    | 13 | -165.13      | 57.38            | 81.96            | -154.29          | -72.20        | -70.49         | -179.57         |

-----  
 |K| Groove parameters |  
 -----

Atom defining backbone: P            12 levels, 3 sub-levels

| Levels |    |   | Minor groove |       |       | Major groove |       |       | Diam  |       |
|--------|----|---|--------------|-------|-------|--------------|-------|-------|-------|-------|
| i      | n  |   | Width        | Depth | Angle | Width        | Depth | Angle |       |       |
| C      | 1  | 0 | --           | --    | --    | C            | --    | --    | --    |       |
|        | 1  | 1 | --           | --    | --    |              | --    | --    | --    |       |
|        | 1  | 2 | --           | --    | --    |              | --    | --    | --    |       |
| G      | 2  | 0 | --           | --    | --    | G            | --    | --    | --    |       |
|        | 2  | 1 | --           | --    | --    |              | --    | --    | --    |       |
|        | 2  | 2 | 10.21        | 0.51  | 31    |              | --    | --    | --    |       |
| C      | 3  | 0 | 10.17        | 0.48  | 27    | C            | --    | --    | --    |       |
|        | 3  | 1 | 10.04        | 0.44  | 30    |              | --    | --    | 18.11 |       |
|        | 3  | 2 | 9.94         | 0.62  | 31    |              | --    | --    | 18.17 |       |
| F      | 4  | 0 | 10.00        | 0.61  | 33    | F            | --    | --    | 18.17 |       |
|        | 4  | 1 | 10.06        | 0.44  | 34    |              | --    | --    | 18.21 |       |
|        | 4  | 2 | 10.16        | 0.26  | 34    |              | --    | --    | 18.33 |       |
| A      | 5  | 0 | 10.22        | 0.36  | 30    | A            | 2.94  | 8.76  | 28    | 18.36 |
|        | 5  | 1 | 10.24        | 0.32  | 31    |              | 3.09  | 8.96  | 26    | 18.10 |
|        | 5  | 2 | 10.29        | 0.33  | 31    |              | 3.18  | 9.33  | 24    | 17.76 |
| A      | 6  | 0 | 10.36        | 0.40  | 30    | A            | 3.22  | 9.56  | 28    | 17.45 |
|        | 6  | 1 | 10.34        | 0.62  | 29    |              | 3.35  | 9.64  | 26    | 17.29 |
|        | 6  | 2 | 10.37        | 0.55  | 32    |              | 3.39  | 9.52  | 27    | 17.17 |
| U      | 7  | 0 | 10.50        | 0.62  | 31    | U            | 3.36  | 9.34  | 26    | 17.19 |
|        | 7  | 1 | 10.58        | 0.51  | 31    |              | 3.43  | 9.13  | 23    | 17.47 |
|        | 7  | 2 | 10.67        | 0.44  | 30    |              | 3.42  | 8.85  | 29    | 17.84 |
| U      | 8  | 0 | 10.72        | 0.43  | 28    | U            | 3.27  | 8.79  | 26    | 18.03 |
|        | 8  | 1 | 10.60        | 0.31  | 33    |              | --    | --    | --    | 17.92 |
| G      | 9  | 0 | 10.39        | 0.55  | 33    | G            | --    | --    | --    | 17.82 |
|        | 9  | 1 | 10.13        | 0.65  | 31    |              | --    | --    | --    | 17.79 |
|        | 9  | 2 | 9.99         | 0.59  | 30    |              | --    | --    | --    | 17.76 |
|        | 9  | 3 | 10.06        | 0.61  | 28    |              | --    | --    | --    | --    |
| G      | 10 | 0 | 10.18        | 0.56  | 26    | G            | --    | --    | --    | --    |
|        | 10 | 1 | 10.22        | 0.46  | 29    |              | --    | --    | --    | --    |
|        | 10 | 2 | --           | --    | --    |              | --    | --    | --    | --    |
| C      | 11 | 0 | --           | --    | --    | C            | --    | --    | --    | --    |
|        | 11 | 1 | --           | --    | --    |              | --    | --    | --    | --    |
|        | 11 | 2 | --           | --    | --    |              | --    | --    | --    | --    |
| G      | 12 | 0 | --           | --    | --    | G            | --    | --    | --    | --    |

## FG RNA DUPLEX 2

\*\*\*\*\*  
\*\*\*\*\* CURVES 5.3 R.L. 1998 \*\*\*\*\*  
\*\*\*\*\*

FILE : dftg\_cd.pdb                    LIS : dftg\_cd  
dna :                                 axin :  
axout:                                daf :  
PDB : dftg\_cd\_axis

acc :        0.000    wid :        0.750

maxn :    500    ior :        0    ibond:        0    splin:        3    break:       -1  
nleve:        3    nbac :        7

ends :        F    supp :        T    COMB :        T    DINU :        F    MINI :        T  
rest :        F    line :        F    zaxe :        F    fit :        F    test :        F  
GRV :        T    old :        T    axonl:        F

Strand=        2    Nucleo=        24    Atoms =        508    Units =        24

Input    1) Xdisp=        0.00    Ydisp=        0.00    Incln=        0.00    Tip=        0.00

Combined strands have    12 levels ...

Strand 1 has    12 bases (5'-3'): CGCFAAUUGGCG

Strand 2 has    12 bases (3'-5'): GCGGUUAAFCGC

FIRST SUM=    139.845    CPTS:        2.409    37.400    7.953    92.083

MINIMISATION: ACC =    0.100E-05    MAXN=    500    NVAR=    48

|      |    |      |         |      |            |
|------|----|------|---------|------|------------|
| STEP | 1  | SUM= | 139.845 | DEL= | 0.000E+00  |
| STEP | 2  | SUM= | 110.225 | DEL= | -0.296E+02 |
| STEP | 3  | SUM= | 88.526  | DEL= | -0.217E+02 |
| STEP | 4  | SUM= | 65.084  | DEL= | -0.234E+02 |
| STEP | 5  | SUM= | 71.167  | DEL= | 0.608E+01  |
| STEP | 6  | SUM= | 54.711  | DEL= | -0.165E+02 |
| STEP | 7  | SUM= | 52.502  | DEL= | -0.221E+01 |
| STEP | 8  | SUM= | 49.245  | DEL= | -0.326E+01 |
| STEP | 9  | SUM= | 44.806  | DEL= | -0.444E+01 |
| STEP | 10 | SUM= | 42.862  | DEL= | -0.194E+01 |
| STEP | 11 | SUM= | 41.230  | DEL= | -0.163E+01 |
| STEP | 12 | SUM= | 39.484  | DEL= | -0.175E+01 |
| STEP | 13 | SUM= | 37.408  | DEL= | -0.208E+01 |
| STEP | 14 | SUM= | 35.139  | DEL= | -0.227E+01 |
| STEP | 15 | SUM= | 42.262  | DEL= | 0.712E+01  |

|      |    |      |        |      |            |
|------|----|------|--------|------|------------|
| STEP | 16 | SUM= | 34.698 | DEL= | -0.756E+01 |
| STEP | 17 | SUM= | 34.029 | DEL= | -0.669E+00 |
| STEP | 18 | SUM= | 33.657 | DEL= | -0.372E+00 |
| STEP | 19 | SUM= | 34.169 | DEL= | 0.513E+00  |
| STEP | 20 | SUM= | 33.547 | DEL= | -0.623E+00 |
| STEP | 21 | SUM= | 33.361 | DEL= | -0.185E+00 |
| STEP | 22 | SUM= | 33.036 | DEL= | -0.326E+00 |
| STEP | 23 | SUM= | 32.592 | DEL= | -0.444E+00 |
| STEP | 24 | SUM= | 31.575 | DEL= | -0.102E+01 |
| STEP | 25 | SUM= | 35.074 | DEL= | 0.350E+01  |
| STEP | 26 | SUM= | 31.388 | DEL= | -0.369E+01 |
| STEP | 27 | SUM= | 31.137 | DEL= | -0.251E+00 |
| STEP | 28 | SUM= | 30.749 | DEL= | -0.388E+00 |
| STEP | 29 | SUM= | 30.136 | DEL= | -0.613E+00 |
| STEP | 30 | SUM= | 30.023 | DEL= | -0.113E+00 |
| STEP | 31 | SUM= | 29.798 | DEL= | -0.225E+00 |
| STEP | 32 | SUM= | 29.236 | DEL= | -0.562E+00 |
| STEP | 33 | SUM= | 28.476 | DEL= | -0.759E+00 |
| STEP | 34 | SUM= | 28.381 | DEL= | -0.951E-01 |
| STEP | 35 | SUM= | 28.226 | DEL= | -0.156E+00 |
| STEP | 36 | SUM= | 28.012 | DEL= | -0.214E+00 |
| STEP | 37 | SUM= | 27.883 | DEL= | -0.128E+00 |
| STEP | 38 | SUM= | 27.825 | DEL= | -0.583E-01 |
| STEP | 39 | SUM= | 27.795 | DEL= | -0.300E-01 |
| STEP | 40 | SUM= | 27.774 | DEL= | -0.209E-01 |
| STEP | 41 | SUM= | 27.763 | DEL= | -0.112E-01 |
| STEP | 42 | SUM= | 27.756 | DEL= | -0.731E-02 |
| STEP | 43 | SUM= | 27.750 | DEL= | -0.545E-02 |
| STEP | 44 | SUM= | 27.749 | DEL= | -0.948E-03 |
| STEP | 45 | SUM= | 27.749 | DEL= | -0.476E-03 |
| STEP | 46 | SUM= | 27.749 | DEL= | -0.598E-04 |
| STEP | 47 | SUM= | 27.749 | DEL= | -0.576E-04 |
| STEP | 48 | SUM= | 27.749 | DEL= | -0.367E-04 |
| STEP | 49 | SUM= | 27.749 | DEL= | -0.458E-04 |
| STEP | 50 | SUM= | 27.749 | DEL= | -0.310E-04 |
| STEP | 51 | SUM= | 27.749 | DEL= | -0.259E-04 |
| STEP | 52 | SUM= | 27.749 | DEL= | -0.178E-04 |
| STEP | 53 | SUM= | 27.749 | DEL= | -0.581E-05 |
| STEP | 54 | SUM= | 27.749 | DEL= | -0.162E-05 |
| STEP | 55 | SUM= | 27.749 | DEL= | -0.612E-06 |
| STEP | 56 | SUM= | 27.749 | DEL= | -0.323E-06 |
| STEP | 57 | SUM= | 27.749 | DEL= | -0.179E-06 |
| STEP | 58 | SUM= | 27.749 | DEL= | -0.100E-06 |
| STEP | 59 | SUM= | 27.749 | DEL= | -0.310E-07 |
| STEP | 60 | SUM= | 27.749 | DEL= | -0.411E-08 |
| STEP | 61 | SUM= | 27.749 | DEL= | -0.655E-09 |
| STEP | 62 | SUM= | 27.749 | DEL= | -0.112E-09 |
| STEP | 63 | SUM= | 27.749 | DEL= | -0.171E-10 |

STEP 64 SUM= 27.749 DEL= -0.170E-11  
 STEP 65 SUM= 27.749 DEL= -0.284E-13  
 STEP 66 SUM= 27.749 DEL= 0.000E+00

FINAL SUM= 27.749 CPTS: 1.331 21.947 1.054 3.417

GRA= 0.14E-07 0.46E-07-0.34E-08-0.59E-10-0.72E-08-0.17E-07 0.42E-08-0.40E-09  
 GRA= 0.87E-08-0.17E-07 0.32E-09 0.42E-09 0.21E-07-0.31E-07 0.72E-09-0.94E-09  
 GRA= 0.21E-07 0.35E-08 0.66E-08-0.61E-10 0.22E-07 0.23E-07-0.42E-08 0.30E-08  
 GRA=-0.34E-08-0.13E-07-0.43E-08-0.16E-08-0.15E-07-0.52E-07 0.23E-08-0.58E-08  
 GRA= 0.10E-07-0.93E-09 0.26E-08-0.57E-08-0.83E-08 0.79E-09 0.21E-08 0.12E-08  
 GRA=-0.15E-07 0.21E-07-0.83E-09 0.50E-08-0.22E-07-0.32E-07-0.44E-08-0.25E-08

-----  
 |A| Global axis parameters |  
 -----

|        |        |       |        |    |        |        |        |    |       |
|--------|--------|-------|--------|----|--------|--------|--------|----|-------|
| 1) U:  | 0.021  | 0.994 | -0.104 | P: | 14.577 | 1.159  | 39.695 | D: | 0.562 |
| 2) U:  | 0.014  | 0.987 | -0.162 | P: | 14.626 | 3.951  | 39.529 | D: | 0.678 |
| 3) U:  | -0.019 | 0.972 | -0.233 | P: | 14.393 | 6.732  | 39.149 | D: | 6.068 |
| 4) U:  | -0.032 | 0.974 | -0.226 | P: | 13.977 | 9.387  | 38.134 | D: | 7.131 |
| 5) U:  | -0.036 | 0.954 | -0.297 | P: | 14.429 | 11.251 | 37.072 | D: | 0.255 |
| 6) U:  | -0.066 | 0.961 | -0.267 | P: | 14.326 | 14.033 | 36.201 | D: | 0.554 |
| 7) U:  | -0.117 | 0.972 | -0.204 | P: | 14.339 | 16.710 | 35.475 | D: | 0.630 |
| 8) U:  | -0.106 | 0.983 | -0.151 | P: | 13.981 | 19.584 | 35.267 | D: | 6.026 |
| 9) U:  | -0.109 | 0.993 | -0.040 | P: | 13.170 | 21.636 | 35.048 | D: | 4.759 |
| 10) U: | -0.034 | 0.999 | 0.007  | P: | 13.141 | 24.544 | 34.715 | D: | 0.331 |
| 11) U: | -0.034 | 0.999 | 0.008  | P: | 13.191 | 27.420 | 34.817 | D: | 0.757 |
| 12) U: | 0.030  | 0.999 | 0.039  | P: | 13.284 | 30.347 | 35.192 |    |       |

-----  
 |B| Global Base-Axis Parameters |  
 -----

| 1st strand |    | Xdisp<br>(dx) | Ydisp<br>(dy) | Inclin<br>(eta) | Tip<br>(theta) | Bc | Tc  |
|------------|----|---------------|---------------|-----------------|----------------|----|-----|
| 1) CT      | 1  | -4.20         | 0.84          | 18.63           | -9.45          | 3  | 0   |
| 2) GA      | 2  | -4.32         | 0.67          | 14.97           | -13.05         | 1  | 13  |
| 3) CT      | 3  | -4.36         | 0.32          | 11.96           | -13.56         | 3  | -7  |
| 4) FY      | 4  | -2.64         | 0.87          | 14.22           | -13.77         | 4  | -27 |
| 5) AE      | 5  | -3.96         | 0.73          | 17.65           | -15.85         | 2  | 28  |
| 6) AE      | 6  | -3.88         | 0.68          | 16.36           | -18.09         | 2  | 24  |
| 7) UI      | 7  | -4.19         | 0.48          | 12.38           | -17.14         | 4  | -24 |
| 8) UI      | 8  | -3.88         | 0.89          | 10.78           | -16.77         | 4  | -26 |
| 9) GA      | 9  | -5.06         | 0.86          | 11.28           | -16.67         | 1  | 11  |
| 10) GA     | 10 | -4.00         | 0.55          | 7.77            | -12.62         | 1  | 5   |
| 11) CT     | 11 | -3.69         | 0.54          | 9.11            | -15.75         | 3  | -13 |

|     |            |    |               |               |                 |                |    |     |
|-----|------------|----|---------------|---------------|-----------------|----------------|----|-----|
| 12) | GA         | 12 | -3.74         | 0.30          | 3.35            | -13.46         | 1  | 0   |
|     | 2nd strand |    | Xdisp<br>(dx) | Ydisp<br>(dy) | Inclin<br>(eta) | Tip<br>(theta) | Bc | Tc  |
| 1)  | GA         | 24 | -4.21         | -0.70         | 13.72           | -4.17          | 1  | 0   |
| 2)  | CT         | 23 | -3.99         | -0.51         | 14.50           | -7.48          | 3  | -13 |
| 3)  | GA         | 22 | -4.28         | -0.76         | 17.60           | -4.10          | 1  | 5   |
| 4)  | GA         | 21 | -5.62         | -1.16         | 14.13           | 1.18           | 1  | 11  |
| 5)  | UI         | 20 | -3.85         | -0.25         | 10.19           | -3.44          | 4  | -26 |
| 6)  | UI         | 19 | -3.93         | -0.39         | 12.65           | -7.72          | 4  | -24 |
| 7)  | AE         | 18 | -4.03         | -0.45         | 17.68           | -7.30          | 2  | 24  |
| 8)  | AE         | 17 | -4.05         | -0.68         | 17.21           | -3.56          | 2  | 28  |
| 9)  | <b>FY</b>  | 16 | -2.25         | -0.12         | 10.87           | -6.75          | 4  | -27 |
| 10) | CT         | 15 | -3.91         | -0.55         | 11.15           | -0.54          | 3  | -7  |
| 11) | GA         | 14 | -4.15         | -0.42         | 7.88            | 0.26           | 1  | 13  |
| 12) | CT         | 13 | -3.83         | -0.07         | 11.44           | 0.10           | 3  | 0   |

-----  
|C| Global Base pair-Axis Parameters |  
-----

Strand 1 with strand 2 ...

| Duplex   |          |                | Xdisp<br>(dx) | Ydisp<br>(dy) | Inclin<br>(eta) | Tip<br>(theta) | Bc | Tc  |
|----------|----------|----------------|---------------|---------------|-----------------|----------------|----|-----|
| 1)       | C        | 1-G 24         | -4.21         | 0.77          | 16.17           | -2.64          | 3  | 0   |
| 2)       | G        | 2-C 23         | -4.16         | 0.59          | 14.74           | -2.79          | 1  | 13  |
| 3)       | C        | 3-G 22         | -4.32         | 0.54          | 14.78           | -4.73          | 3  | -7  |
| 4)       | <b>F</b> | 4-G 21         | -4.13         | 1.01          | 14.18           | -7.47          | 4  | -27 |
| 5)       | A        | 5-U 20         | -3.90         | 0.49          | 13.92           | -6.20          | 2  | 28  |
| 6)       | A        | 6-U 19         | -3.91         | 0.54          | 14.50           | -5.19          | 2  | 24  |
| 7)       | U        | 7-A 18         | -4.11         | 0.47          | 15.03           | -4.92          | 4  | -24 |
| 8)       | U        | 8-A 17         | -3.97         | 0.79          | 14.00           | -6.61          | 4  | -26 |
| 9)       | G        | 9- <b>F</b> 16 | -3.65         | 0.49          | 11.07           | -4.96          | 1  | 11  |
| 10)      | G        | 10-C 15        | -3.96         | 0.55          | 9.46            | -6.04          | 1  | 5   |
| 11)      | C        | 11-G 14        | -3.92         | 0.48          | 8.50            | -8.00          | 3  | -13 |
| 12)      | G        | 12-C 13        | -3.79         | 0.18          | 7.40            | -6.78          | 1  | 0   |
| Average: |          |                | -4.00         | 0.57          | 12.81           | -5.53          |    |     |

-----  
|D| Global Base-Base Parameters |  
-----

Strand 1 with strand 2 ...

| Duplex              | Shear<br>(Sx) | Stretch<br>(Sy) | Stagger<br>(Sz) | Buckle<br>(kappa) | Propel<br>(omega) | Opening<br>(sigma) | Bc | T   |
|---------------------|---------------|-----------------|-----------------|-------------------|-------------------|--------------------|----|-----|
| 1) C 1-G 24         | 0.01          | 0.14            | -0.07           | 4.90              | -13.62            | 0.35               | 3  | 0   |
| 2) G 2-C 23         | -0.33         | 0.16            | -0.07           | 0.47              | -20.53            | 2.13               | 1  | 13  |
| 3) C 3-G 22         | -0.08         | -0.44           | 0.15            | -5.64             | -17.66            | -5.77              | 3  | -7  |
| 4) <b>F</b> 4-G 21  | 2.99          | -0.30           | 0.43            | 0.09              | -12.59            | -2.24              | 4  | -27 |
| 5) A 5-U 20         | -0.12         | 0.48            | 0.06            | 7.46              | -19.29            | 8.08               | 2  | 28  |
| 6) A 6-U 19         | 0.05          | 0.29            | -0.10           | 3.71              | -25.81            | 4.41               | 2  | 24  |
| 7) U 7-A 18         | -0.15         | 0.03            | -0.16           | -5.31             | -24.44            | -0.14              | 4  | -24 |
| 8) U 8-A 17         | 0.17          | 0.21            | 0.01            | -6.43             | -20.33            | 3.23               | 4  | -26 |
| 9) G 9- <b>F</b> 16 | -2.81         | 0.74            | -0.20           | 0.41              | -23.42            | 11.20              | 1  | 11  |
| 10) G 10-C 15       | -0.09         | 0.00            | 0.05            | -3.38             | -13.15            | -0.28              | 1  | 5   |
| 11) C 11-G 14       | 0.45          | 0.12            | -0.02           | 1.23              | -15.49            | 1.31               | 3  | -13 |
| 12) G 12-C 13       | 0.09          | 0.23            | -0.08           | -8.09             | -13.36            | 1.34               | 1  | 0   |
| Average:            | 0.01          | 0.14            | 0.00            | -0.88             | -18.31            | 1.97               |    |     |

-----  
|E| Global Inter-Base Parameters |  
-----

| 1st strand           | Shift<br>(Dx) | Slide<br>(Dy) | Rise<br>(Dz) | Tilt<br>(tau) | Roll<br>(rho) | Twist<br>(Omega) | Dc |
|----------------------|---------------|---------------|--------------|---------------|---------------|------------------|----|
| 2) C 1/G 2           | -0.12         | -0.38         | 2.79         | -7.01         | -3.96         | 34.42            | 8  |
| 3) G 2/C 3           | -0.33         | -0.37         | 2.92         | -7.54         | 0.33          | 31.95            | 5  |
| 4) C 3/ <b>F</b> 4   | 2.00          | 0.98          | 2.97         | 1.67          | -0.80         | 44.30            | -3 |
| 5) <b>F</b> 4/A 5    | -0.96         | -0.79         | 1.88         | 4.47          | 2.03          | 27.53            | 10 |
| 6) A 5/A 6           | 0.08          | -0.12         | 2.84         | -3.76         | -2.26         | 32.68            | 4  |
| 7) A 6/U 7           | -0.55         | -0.32         | 2.73         | -8.16         | 3.17          | 30.79            | 7  |
| 8) U 7/U 8           | 0.47          | 0.68          | 2.97         | -4.65         | 1.10          | 38.49            | -4 |
| 9) U 8/G 9           | -0.86         | -0.52         | 2.03         | -3.10         | 5.40          | 26.31            | -9 |
| 10) G 9/G 10         | 0.77          | -0.15         | 3.04         | -7.93         | 6.53          | 35.58            | 1  |
| 11) G 10/C 11        | 0.46          | 0.07          | 2.84         | 1.35          | -3.12         | 34.64            | 5  |
| 12) C 11/G 12        | 0.16          | -0.49         | 2.91         | -5.44         | 6.37          | 32.56            | 8  |
|                      |               |               |              |               |               |                  |    |
| 2nd strand           | Shift<br>(Dx) | Slide<br>(Dy) | Rise<br>(Dz) | Tilt<br>(tau) | Roll<br>(rho) | Twist<br>(Omega) | Dc |
| 2) G 24/C 23         | 0.22          | 0.40          | 2.79         | -2.58         | -2.95         | 32.64            | 8  |
| 3) C 23/G 22         | -0.58         | -0.23         | 2.69         | -1.43         | 2.54          | 39.85            | 5  |
| 4) G 22/G 21         | -1.07         | -0.84         | 2.69         | -4.07         | 5.87          | 40.77            | 1  |
| 5) G 21/U 20         | 2.14          | 1.57          | 2.25         | -2.90         | -8.73         | 17.21            | -9 |
| 6) U 20/U 19         | -0.09         | -0.08         | 3.00         | -0.01         | -4.26         | 36.36            | -4 |
| 7) U 19/A 18         | -0.35         | 0.06          | 2.79         | 0.85          | -1.80         | 35.34            | 7  |
| 8) A 18/A 17         | 0.14          | -0.50         | 2.80         | -3.52         | 3.01          | 35.13            | 4  |
| 9) A 17/ <b>F</b> 16 | 2.12          | 1.05          | 2.25         | -9.94         | -8.49         | 18.34            | 10 |



|     |          |      |    |       |       |      |       |       |       |    |
|-----|----------|------|----|-------|-------|------|-------|-------|-------|----|
| 10) | <b>F</b> | 16/C | 15 | -1.96 | -0.59 | 2.78 | -4.14 | 3.73  | 47.06 | -3 |
| 11) | C        | 15/G | 14 | -0.08 | 0.05  | 2.91 | -3.27 | 0.78  | 33.04 | 5  |
| 12) | G        | 14/C | 13 | 0.52  | 0.60  | 2.97 | 3.88  | -4.24 | 32.53 | 8  |

-----  
|F| Global Inter-Base pair Parameters |  
-----

Strand 1 with strand 2 ...

| Duplex   |          |             |    | Shift<br>(Dx) | Slide<br>(Dy) | Rise<br>(Dz) | Tilt<br>(tau) | Roll<br>(rho) | Twist<br>(Omega) | Dc |
|----------|----------|-------------|----|---------------|---------------|--------------|---------------|---------------|------------------|----|
| 2)       | C        | 1/G         | 2  | 0.05          | -0.39         | 2.79         | -4.80         | -0.50         | 33.53            | 8  |
| 3)       | G        | 2/C         | 3  | -0.45         | -0.07         | 2.80         | -4.48         | -1.10         | 35.90            | 5  |
| 4)       | C        | 3/ <b>F</b> | 4  | 0.46          | 0.91          | 2.83         | -1.20         | -3.34         | 42.53            | -3 |
| 5)       | <b>F</b> | 4/A         | 5  | 0.59          | -1.18         | 2.06         | 0.79          | 5.38          | 22.37            | 10 |
| 6)       | A        | 5/A         | 6  | 0.00          | -0.02         | 2.92         | -1.89         | 1.00          | 34.52            | 4  |
| 7)       | A        | 6/U         | 7  | -0.45         | -0.19         | 2.76         | -3.66         | 2.48          | 33.06            | 7  |
| 8)       | U        | 7/U         | 8  | 0.31          | 0.59          | 2.89         | -4.09         | -0.95         | 36.81            | -4 |
| 9)       | U        | 8/G         | 9  | 0.63          | -0.79         | 2.14         | -6.52         | 6.94          | 22.32            | -9 |
| 10)      | G        | 9/G         | 10 | -0.60         | 0.22          | 2.91         | -6.04         | 1.40          | 41.32            | 1  |
| 11)      | G        | 10/C        | 11 | 0.19          | 0.01          | 2.87         | -0.96         | -1.95         | 33.84            | 5  |
| 12)      | C        | 11/G        | 12 | 0.34          | -0.55         | 2.94         | -0.78         | 5.31          | 32.55            | 8  |
| Average: |          |             |    | 0.10          | -0.13         | 2.72         | -3.06         | 1.33          | 33.52            |    |

-----  
|G| Local Inter-Base Parameters |  
-----

| 1st strand |          |             |    | Shift<br>(Dx) | Slide<br>(Dy) | Rise<br>(Dz) | Tilt<br>(tau) | Roll<br>(rho) | Twist<br>(Omega) | Dc |
|------------|----------|-------------|----|---------------|---------------|--------------|---------------|---------------|------------------|----|
| 2)         | C        | 1/G         | 2  | 0.12          | -1.99         | 3.49         | -0.37         | 6.05          | 33.78            | 8  |
| 3)         | G        | 2/C         | 3  | 0.22          | -2.01         | 3.53         | -0.22         | 7.61          | 31.83            | 5  |
| 4)         | C        | 3/ <b>F</b> | 4  | 2.06          | -1.03         | 2.86         | 11.54         | 8.96          | 41.92            | -3 |
| 5)         | <b>F</b> | 4/A         | 5  | -0.62         | -1.71         | 2.94         | 10.82         | 9.35          | 23.45            | 10 |
| 6)         | A        | 5/A         | 6  | 0.65          | -1.42         | 3.33         | 5.46          | 7.38          | 31.01            | 4  |
| 7)         | A        | 6/U         | 7  | 0.20          | -1.70         | 3.46         | 1.15          | 10.70         | 30.42            | 7  |
| 8)         | U        | 7/U         | 8  | 0.93          | -1.41         | 3.19         | 6.43          | 8.68          | 37.38            | -4 |
| 9)         | U        | 8/G         | 9  | -0.41         | -2.08         | 3.10         | 4.44          | 10.50         | 24.57            | -9 |
| 10)        | G        | 9/G         | 10 | 1.19          | -2.39         | 3.39         | 1.24          | 12.31         | 35.65            | 1  |
| 11)        | G        | 10/C        | 11 | 0.84          | -1.77         | 3.03         | 9.53          | 2.02          | 32.97            | 5  |
| 12)        | C        | 11/G        | 12 | 0.79          | -2.24         | 3.32         | 2.97          | 9.74          | 32.31            | 8  |
| 2nd strand |          |             |    | Shift<br>(Dx) | Slide<br>(Dy) | Rise<br>(Dz) | Tilt<br>(tau) | Roll<br>(rho) | Twist<br>(Omega) | Dc |

|     |          |              |    |       |       |      |        |       |       |    |
|-----|----------|--------------|----|-------|-------|------|--------|-------|-------|----|
| 2)  | G        | 24/C         | 23 | -0.45 | -2.01 | 3.26 | -5.82  | 10.64 | 31.45 | 8  |
| 3)  | C        | 23/G         | 22 | -1.32 | -1.77 | 3.20 | -5.38  | 8.48  | 37.72 | 5  |
| 4)  | G        | 22/G         | 21 | -1.69 | -1.83 | 3.24 | -4.86  | 5.40  | 39.28 | 1  |
| 5)  | G        | 21/U         | 20 | 1.87  | -2.38 | 3.19 | -3.31  | 12.22 | 15.96 | -9 |
| 6)  | U        | 20/U         | 19 | -0.61 | -1.79 | 3.32 | -3.57  | 11.00 | 35.64 | -4 |
| 7)  | U        | 19/A         | 18 | -1.06 | -1.67 | 3.34 | -3.77  | 10.77 | 33.40 | 7  |
| 8)  | A        | 18/A         | 17 | -0.49 | -1.02 | 3.25 | -6.63  | 7.45  | 32.86 | 4  |
| 9)  | A        | 17/ <b>F</b> | 16 | 1.77  | -1.37 | 3.08 | -11.75 | 12.42 | 15.70 | 10 |
| 10) | <b>F</b> | 16/C         | 15 | -2.28 | -1.31 | 3.10 | -7.11  | 5.24  | 45.38 | -3 |
| 11) | C        | 15/G         | 14 | -0.33 | -1.84 | 3.25 | -3.21  | 4.64  | 32.60 | 5  |
| 12) | G        | 14/C         | 13 | 0.35  | -2.26 | 3.66 | 3.81   | 9.57  | 31.44 | 8  |

-----  
|H| Local Inter-Base pair Parameters |  
-----

Strand 1 with strand 2 ...

| Duplex   | Shift<br>(Dx) | Slide<br>(Dy) | Rise<br>(Dz) | Tilt<br>(tau) | Roll<br>(rho) | Twist<br>(Omega) | Dc    |       |       |    |
|----------|---------------|---------------|--------------|---------------|---------------|------------------|-------|-------|-------|----|
| 2)       | C             | 1/G           | 2            | -0.17         | -2.00         | 3.38             | -3.10 | 8.37  | 32.89 | 8  |
| 3)       | G             | 2/C           | 3            | -0.58         | -1.89         | 3.44             | -2.85 | 8.03  | 35.29 | 5  |
| 4)       | C             | 3/ <b>F</b>   | 4            | 0.22          | -1.49         | 3.23             | 3.41  | 6.93  | 40.84 | -3 |
| 5)       | <b>F</b>      | 4/A           | 5            | 0.64          | -2.06         | 2.90             | 3.83  | 10.98 | 19.79 | 10 |
| 6)       | A             | 5/A           | 6            | 0.02          | -1.57         | 3.40             | 1.07  | 9.43  | 33.73 | 4  |
| 7)       | A             | 6/U           | 7            | -0.43         | -1.68         | 3.46             | -1.34 | 10.78 | 32.68 | 7  |
| 8)       | U             | 7/U           | 8            | 0.22          | -1.20         | 3.30             | -0.12 | 8.21  | 35.66 | -4 |
| 9)       | U             | 8/G           | 9            | 0.68          | -1.79         | 2.88             | -3.62 | 12.01 | 20.44 | -9 |
| 10)      | G             | 9/G           | 10           | -0.54         | -1.76         | 3.49             | -3.16 | 8.98  | 40.92 | 1  |
| 11)      | G             | 10/C          | 11           | 0.26          | -1.80         | 3.18             | 3.19  | 3.36  | 33.00 | 5  |
| 12)      | C             | 11/G          | 12           | 0.58          | -2.25         | 3.49             | 3.41  | 9.64  | 32.11 | 8  |
| Average: |               |               |              | 0.08          | -1.77         | 3.29             | 0.06  | 8.79  | 32.49 |    |

-----  
|I| Global Axis Curvature |  
-----

| Duplex | Ax       | Ay          | Ainc | Atip  | Adis  | Angle | Path  | Dc   |      |      |    |
|--------|----------|-------------|------|-------|-------|-------|-------|------|------|------|----|
| 2)     | C        | 1/G         | 2    | 0.00  | -0.21 | -3.36 | -0.35 | 0.21 | 3.38 | 2.80 | 8  |
| 3)     | G        | 2/C         | 3    | -0.29 | -0.01 | -4.53 | 0.84  | 0.29 | 4.61 | 2.82 | 5  |
| 4)     | C        | 3/ <b>F</b> | 4    | 0.27  | 0.43  | -0.60 | -0.59 | 0.51 | 0.84 | 2.87 | -3 |
| 5)     | <b>F</b> | 4/A         | 5    | 0.36  | -0.66 | 1.04  | 4.11  | 0.75 | 4.24 | 2.19 | 10 |
| 6)     | A        | 5/A         | 6    | 0.00  | -0.07 | -2.47 | -0.02 | 0.07 | 2.47 | 2.92 | 4  |
| 7)     | A        | 6/U         | 7    | -0.25 | -0.12 | -4.18 | 2.22  | 0.28 | 4.73 | 2.77 | 7  |

|     |   |      |    |       |       |       |      |      |      |      |    |
|-----|---|------|----|-------|-------|-------|------|------|------|------|----|
| 8)  | U | 7/U  | 8  | 0.16  | 0.26  | -3.05 | 0.74 | 0.31 | 3.14 | 2.90 | -4 |
| 9)  | U | 8/G  | 9  | 0.32  | -0.49 | -3.59 | 5.30 | 0.58 | 6.40 | 2.22 | -9 |
| 10) | G | 9/G  | 10 | -0.29 | 0.16  | -4.42 | 2.47 | 0.34 | 5.07 | 2.93 | 1  |
| 11) | G | 10/C | 11 | 0.15  | 0.08  | 0.00  | 0.01 | 0.17 | 0.01 | 2.88 | 5  |
| 12) | C | 11/G | 12 | 0.21  | -0.25 | 0.32  | 4.09 | 0.32 | 4.10 | 2.95 | 8  |

Overall axis bend ... UU= 8.24 PP= 10.74

| Duplex | Offset | L.Dir | ... wrt end-to-end vector |
|--------|--------|-------|---------------------------|
| 1) C   | 1      | 0.00  | 0.00                      |
| 2) G   | 2      | 0.31  | 104.80                    |
| 3) C   | 3      | 0.32  | 50.57                     |
| 4) F   | 4      | 0.37  | -145.99                   |
| 5) A   | 5      | 1.10  | 131.49                    |
| 6) A   | 6      | 1.53  | 102.43                    |
| 7) U   | 7      | 1.86  | 69.40                     |
| 8) U   | 8      | 1.58  | 36.78                     |
| 9) G   | 9      | 1.55  | 36.79                     |
| 10) G  | 10     | 1.41  | -1.36                     |
| 11) C  | 11     | 0.85  | -37.18                    |
| 12) G  | 12     | 0.00  | 0.00                      |

Path length= 30.25 End-to-end= 29.56 Shortening= 2.27 %

-----  
|J| Backbone Parameters |  
-----

| 1st strand |    | C1'-C2' | C2'-C3' | Phase | Ampli | Pucker   | C1'   | C2'   | C3'   |
|------------|----|---------|---------|-------|-------|----------|-------|-------|-------|
| 1)CT       | 1  | -33.46  | 43.91   | 6.21  | 44.45 | C3'-endo | 104.7 | 102.3 | 100.2 |
| 2)GA       | 2  | -33.18  | 45.30   | 10.50 | 47.45 | C3'-endo | 109.9 | 97.7  | 100.5 |
| 3)CT       | 3  | -31.90  | 41.82   | 7.40  | 43.04 | C3'-endo | 108.1 | 100.6 | 101.2 |
| 4)FY       | 4  | -35.88  | 46.57   | 5.49  | 47.46 | C3'-endo | 104.4 | 99.7  | 99.5  |
| 5)AE       | 5  | -32.57  | 45.12   | 10.48 | 46.87 | C3'-endo | 110.1 | 97.5  | 101.4 |
| 6)AE       | 6  | -32.31  | 45.05   | 12.41 | 46.98 | C3'-endo | 105.2 | 101.9 | 98.3  |
| 7)UI       | 7  | -35.89  | 48.67   | 10.21 | 50.56 | C3'-endo | 106.4 | 98.5  | 98.1  |
| 8)UI       | 8  | -28.23  | 41.40   | 13.79 | 43.00 | C3'-endo | 105.8 | 101.2 | 101.3 |
| 9)GA       | 9  | -25.39  | 41.33   | 20.34 | 44.93 | C3'-endo | 106.6 | 100.6 | 100.6 |
| 10)GA      | 10 | -28.49  | 42.63   | 15.93 | 45.09 | C3'-endo | 105.5 | 101.4 | 99.3  |
| 11)CT      | 11 | -29.03  | 41.86   | 13.49 | 43.89 | C3'-endo | 105.1 | 100.9 | 100.4 |
| 12)GA      | 12 | -28.86  | 42.37   | 15.72 | 45.04 | C3'-endo | 106.8 | 100.9 | 99.1  |

Torsions            Chi        Gamma        Delta        Epsil        Zeta        Alpha        Beta  
                      C1'-N    C5'-C4'    C4'-C3'    C3'-O3'    O3'-P    P-O5'    O5'-C5'

|       |    |         |       |       |         |        |        |        |
|-------|----|---------|-------|-------|---------|--------|--------|--------|
| 1)CT  | 1  | -167.11 | 49.18 | 82.37 | -152.16 | -71.54 | -64.89 | 174.40 |
| 2)GA  | 2  | -160.26 | 53.06 | 78.70 | -153.10 | -71.38 | -60.75 | 173.96 |
| 3)CT  | 3  | -158.91 | 52.41 | 83.59 | -133.76 | -64.56 | -74.51 | 158.16 |
| 4)FY  | 4  | -158.47 | 58.80 | 76.10 | -161.09 | -72.49 | -68.71 | 174.37 |
| 5)AE  | 5  | -152.21 | 55.18 | 79.70 | -154.38 | -73.74 | -63.24 | 163.28 |
| 6)AE  | 6  | -157.70 | 58.23 | 84.69 | -154.12 | -74.11 | -66.54 | 170.64 |
| 7)UI  | 7  | -160.54 | 53.59 | 78.87 | -146.81 | -76.52 | -63.98 | 169.34 |
| 8)UI  | 8  | -158.42 | 51.39 | 79.87 | -159.01 | -66.13 | -66.31 | 174.64 |
| 9)GA  | 9  | -164.58 | 49.19 | 72.45 | -150.55 | -63.34 | -65.34 | 178.01 |
| 10)GA | 10 | -165.43 | 52.11 | 75.35 | -148.67 | -71.78 | -62.24 | 164.35 |
| 11)CT | 11 | -162.78 | 57.08 | 77.53 | -154.34 | -63.23 | -68.13 | 176.52 |
| 12)GA | 12 | -161.60 | 56.88 | 79.80 | .....   | .....  | .....  | .....  |

|       | 2nd strand | C1'-C2' | C2'-C3' | Phase | Ampli | Pucker   | C1'   | C2'   | C3'   |
|-------|------------|---------|---------|-------|-------|----------|-------|-------|-------|
| 1)GA  | 24         | -29.47  | 41.63   | 11.89 | 43.08 | C3'-endo | 106.2 | 101.8 | 101.0 |
| 2)CT  | 23         | -30.02  | 44.34   | 15.21 | 46.98 | C3'-endo | 107.3 | 98.7  | 99.8  |
| 3)GA  | 22         | -32.71  | 43.88   | 8.60  | 45.17 | C3'-endo | 105.7 | 100.5 | 99.9  |
| 4)GA  | 21         | -26.86  | 43.61   | 20.29 | 47.42 | C3'-endo | 107.3 | 99.4  | 100.4 |
| 5)UI  | 20         | -28.72  | 43.82   | 15.66 | 45.87 | C3'-endo | 106.7 | 100.0 | 101.5 |
| 6)UI  | 19         | -30.85  | 43.86   | 12.61 | 45.59 | C3'-endo | 106.1 | 100.3 | 99.5  |
| 7)AE  | 18         | -29.98  | 43.45   | 12.50 | 45.24 | C3'-endo | 108.4 | 97.6  | 103.0 |
| 8)AE  | 17         | -35.93  | 46.48   | 6.22  | 47.87 | C3'-endo | 108.4 | 98.4  | 100.5 |
| 9)FY  | 16         | -31.62  | 44.64   | 11.21 | 45.92 | C3'-endo | 103.9 | 100.5 | 100.3 |
| 10)CT | 15         | -30.09  | 45.09   | 16.02 | 47.80 | C3'-endo | 107.5 | 99.3  | 99.7  |
| 11)GA | 14         | -37.39  | 46.68   | 4.79  | 48.53 | C3'-endo | 109.9 | 96.2  | 100.6 |
| 12)CT | 13         | -36.06  | 46.71   | 7.64  | 48.41 | C3'-endo | 107.5 | 99.4  | 98.5  |

|       | Torsions | Chi<br>C1'-N | Gamma<br>C5'-C4' | Delta<br>C4'-C3' | Epsil<br>C3'-O3' | Zeta<br>O3'-P | Alpha<br>P-O5' | Beta<br>O5'-C5' |
|-------|----------|--------------|------------------|------------------|------------------|---------------|----------------|-----------------|
| 1)GA  | 24       | -158.20      | 53.15            | 83.65            | .....            | .....         | .....          | .....           |
| 2)CT  | 23       | -163.07      | 52.50            | 77.51            | -151.84          | -73.99        | -58.39         | 173.06          |
| 3)GA  | 22       | -163.82      | 59.07            | 80.16            | -141.92          | -68.64        | -67.16         | 167.22          |
| 4)GA  | 21       | -162.64      | 50.54            | 74.30            | -151.06          | -66.35        | -63.79         | 167.43          |
| 5)UI  | 20       | -163.21      | 52.69            | 78.68            | -159.79          | -71.90        | -68.68         | -179.04         |
| 6)UI  | 19       | -161.89      | 56.35            | 80.11            | -152.70          | -71.57        | -70.06         | 174.59          |
| 7)AE  | 18       | -155.49      | 50.61            | 82.64            | -145.23          | -73.21        | -66.66         | 168.89          |
| 8)AE  | 17       | -148.59      | 54.88            | 78.64            | -157.39          | -70.29        | -66.14         | 168.07          |
| 9)FY  | 16       | -158.91      | 52.28            | 80.93            | -151.00          | -84.30        | -67.96         | 167.70          |
| 10)CT | 15       | -159.96      | 53.17            | 80.87            | -151.62          | -62.95        | -68.28         | 167.83          |
| 11)GA | 14       | -159.90      | 51.22            | 84.57            | -152.21          | -70.15        | -65.61         | 169.44          |
| 12)CT | 13       | -165.50      | 48.13            | 85.48            | -157.50          | -72.26        | -69.02         | -178.91         |

-----  
 |K| Groove parameters |  
 -----

Atom defining backbone: P            12 levels, 3 sub-levels

| Levels |    |   | Minor groove |       |       | Major groove |       |       | Diam  |       |
|--------|----|---|--------------|-------|-------|--------------|-------|-------|-------|-------|
| i      | n  |   | Width        | Depth | Angle | Width        | Depth | Angle |       |       |
| C      | 1  | 0 | --           | --    | --    | C            | --    | --    | --    |       |
|        | 1  | 1 | --           | --    | --    |              | --    | --    | --    |       |
|        | 1  | 2 | --           | --    | --    |              | --    | --    | --    |       |
| G      | 2  | 0 | --           | --    | --    | G            | --    | --    | --    |       |
|        | 2  | 1 | 10.19        | 0.81  | 33    |              | --    | --    | --    |       |
|        | 2  | 2 | 10.54        | 0.60  | 27    |              | --    | --    | --    |       |
| C      | 3  | 0 | 10.76        | 0.09  | 31    | C            | --    | --    | --    |       |
|        | 3  | 1 | 10.78        | -0.10 | 31    |              | --    | --    | --    |       |
|        | 3  | 2 | 10.74        | -0.13 | 31    |              | --    | --    | 17.65 |       |
| F      | 4  | 0 | 10.64        | -0.14 | 32    | F            | --    | --    | 17.92 |       |
|        | 4  | 1 | 10.39        | 0.28  | 33    |              | --    | --    | 18.31 |       |
| A      | 5  | 0 | 10.07        | 0.74  | 34    | A            | --    | --    | 19.07 |       |
|        | 5  | 1 | 9.80         | 1.06  | 30    |              | 3.59  | 8.04  | 27    | 19.11 |
|        | 5  | 2 | 9.75         | 1.24  | 29    |              | 4.10  | 8.24  | 23    | 18.61 |
| A      | 6  | 0 | 9.76         | 1.40  | 28    | A            | 4.53  | 8.50  | 26    | 17.99 |
|        | 6  | 1 | 9.82         | 1.19  | 31    |              | 4.78  | 9.18  | 22    | 17.63 |
|        | 6  | 2 | 10.00        | 1.21  | 28    |              | 4.98  | 9.78  | 22    | 17.47 |
| U      | 7  | 0 | 10.20        | 0.91  | 29    | U            | 4.78  | 10.15 | 26    | 17.42 |
|        | 7  | 1 | 10.33        | 0.72  | 34    |              | 4.12  | 9.76  | 29    | 17.49 |
|        | 7  | 2 | 10.39        | 0.88  | 31    |              | 3.38  | 9.29  | 25    | 17.75 |
| U      | 8  | 0 | 10.36        | 0.70  | 33    | U            | 2.82  | 8.90  | 26    | 18.19 |
|        | 8  | 1 | 10.28        | 0.67  | 35    |              | --    | --    | --    | 18.35 |
|        | 8  | 2 | 10.19        | 0.65  | 38    |              | --    | --    | --    | 18.30 |
| G      | 9  | 0 | 10.11        | 0.90  | 35    | G            | --    | --    | --    | 18.33 |
|        | 9  | 1 | 10.06        | 0.70  | 34    |              | --    | --    | --    | 18.56 |
|        | 9  | 2 | 10.13        | 0.57  | 33    |              | --    | --    | --    | 18.63 |
| G      | 10 | 0 | 10.17        | 0.62  | 31    | G            | --    | --    | --    | 18.66 |
|        | 10 | 1 | 10.09        | 0.72  | 34    |              | --    | --    | --    | --    |
|        | 10 | 2 | --           | --    | --    |              | --    | --    | --    | --    |
| C      | 11 | 0 | --           | --    | --    | C            | --    | --    | --    | --    |
|        | 11 | 1 | --           | --    | --    |              | --    | --    | --    | --    |
|        | 11 | 2 | --           | --    | --    |              | --    | --    | --    | --    |
| G      | 12 | 0 | --           | --    | --    | G            | --    | --    | --    | --    |

# GA RNA DUPLEX

\*\*\*\*\*  
\*\*\*\*\* CURVES 5.3 R.L. 1998 \*\*\*\*\*  
\*\*\*\*\*

FILE : new\_ga\_C2.pdb                    LIS : new\_ga\_C2  
dna :                                    axin :  
axout:                                   daf :  
PDB : new\_ga\_C2\_axis

acc :        0.000    wid :        0.750

maxn :    500    ior :        0    ibond:        0    splin:        3    break:       -1  
nleve:        3    nbac :        7

ends :        F    supp :        T    COMB :        T    DINU :        F    MINI :        T  
rest :        F    line :        F    zaxe :        F    fit :        F    test :        F  
GRV :        T    old :        T    axonl:        F

Strand=        2    Nucleo=        24    Atoms =        510    Units =        24

Input    1) Xdisp=        0.00    Ydisp=        0.00    Incln=        0.00    Tip=        0.00

Combined strands have    12 levels ...

Strand 1 has    12 bases (5'-3'): CGCGAAUUAGCG

Strand 2 has    12 bases (3'-5'): GCGAUUAAGCGC

FIRST SUM=    106.511    CPTS:        3.410    14.151    9.274    79.676

MINIMISATION: ACC =    0.100E-05    MAXN=    500    NVAR=    48

|      |    |      |         |      |            |
|------|----|------|---------|------|------------|
| STEP | 1  | SUM= | 106.511 | DEL= | 0.000E+00  |
| STEP | 2  | SUM= | 82.610  | DEL= | -0.239E+02 |
| STEP | 3  | SUM= | 56.972  | DEL= | -0.256E+02 |
| STEP | 4  | SUM= | 43.613  | DEL= | -0.134E+02 |
| STEP | 5  | SUM= | 40.069  | DEL= | -0.354E+01 |
| STEP | 6  | SUM= | 36.200  | DEL= | -0.387E+01 |
| STEP | 7  | SUM= | 32.421  | DEL= | -0.378E+01 |
| STEP | 8  | SUM= | 28.211  | DEL= | -0.421E+01 |
| STEP | 9  | SUM= | 30.324  | DEL= | 0.211E+01  |
| STEP | 10 | SUM= | 26.528  | DEL= | -0.380E+01 |
| STEP | 11 | SUM= | 26.033  | DEL= | -0.495E+00 |
| STEP | 12 | SUM= | 25.202  | DEL= | -0.831E+00 |
| STEP | 13 | SUM= | 23.811  | DEL= | -0.139E+01 |
| STEP | 14 | SUM= | 21.740  | DEL= | -0.207E+01 |
| STEP | 15 | SUM= | 23.530  | DEL= | 0.179E+01  |

|      |    |      |        |      |            |
|------|----|------|--------|------|------------|
| STEP | 16 | SUM= | 21.016 | DEL= | -0.251E+01 |
| STEP | 17 | SUM= | 19.746 | DEL= | -0.127E+01 |
| STEP | 18 | SUM= | 18.060 | DEL= | -0.169E+01 |
| STEP | 19 | SUM= | 42.530 | DEL= | 0.245E+02  |
| STEP | 20 | SUM= | 17.772 | DEL= | -0.248E+02 |
| STEP | 21 | SUM= | 17.884 | DEL= | 0.112E+00  |
| STEP | 22 | SUM= | 17.652 | DEL= | -0.232E+00 |
| STEP | 23 | SUM= | 17.468 | DEL= | -0.184E+00 |
| STEP | 24 | SUM= | 17.167 | DEL= | -0.300E+00 |
| STEP | 25 | SUM= | 16.821 | DEL= | -0.347E+00 |
| STEP | 26 | SUM= | 17.345 | DEL= | 0.524E+00  |
| STEP | 27 | SUM= | 16.722 | DEL= | -0.623E+00 |
| STEP | 28 | SUM= | 16.564 | DEL= | -0.158E+00 |
| STEP | 29 | SUM= | 16.301 | DEL= | -0.263E+00 |
| STEP | 30 | SUM= | 16.025 | DEL= | -0.275E+00 |
| STEP | 31 | SUM= | 15.728 | DEL= | -0.297E+00 |
| STEP | 32 | SUM= | 15.204 | DEL= | -0.524E+00 |
| STEP | 33 | SUM= | 14.511 | DEL= | -0.693E+00 |
| STEP | 34 | SUM= | 15.526 | DEL= | 0.102E+01  |
| STEP | 35 | SUM= | 14.081 | DEL= | -0.145E+01 |
| STEP | 36 | SUM= | 13.567 | DEL= | -0.514E+00 |
| STEP | 37 | SUM= | 13.073 | DEL= | -0.494E+00 |
| STEP | 38 | SUM= | 13.204 | DEL= | 0.130E+00  |
| STEP | 39 | SUM= | 12.863 | DEL= | -0.340E+00 |
| STEP | 40 | SUM= | 12.856 | DEL= | -0.729E-02 |
| STEP | 41 | SUM= | 12.791 | DEL= | -0.654E-01 |
| STEP | 42 | SUM= | 12.770 | DEL= | -0.208E-01 |
| STEP | 43 | SUM= | 12.738 | DEL= | -0.322E-01 |
| STEP | 44 | SUM= | 12.707 | DEL= | -0.310E-01 |
| STEP | 45 | SUM= | 12.700 | DEL= | -0.696E-02 |
| STEP | 46 | SUM= | 12.689 | DEL= | -0.104E-01 |
| STEP | 47 | SUM= | 12.685 | DEL= | -0.422E-02 |
| STEP | 48 | SUM= | 12.681 | DEL= | -0.399E-02 |
| STEP | 49 | SUM= | 12.681 | DEL= | 0.192E-03  |
| STEP | 50 | SUM= | 12.680 | DEL= | -0.138E-02 |
| STEP | 51 | SUM= | 12.680 | DEL= | -0.272E-03 |
| STEP | 52 | SUM= | 12.679 | DEL= | -0.226E-03 |
| STEP | 53 | SUM= | 12.679 | DEL= | -0.179E-04 |
| STEP | 54 | SUM= | 12.679 | DEL= | -0.324E-04 |
| STEP | 55 | SUM= | 12.679 | DEL= | -0.439E-04 |
| STEP | 56 | SUM= | 12.679 | DEL= | -0.540E-04 |
| STEP | 57 | SUM= | 12.679 | DEL= | -0.678E-04 |
| STEP | 58 | SUM= | 12.679 | DEL= | -0.255E-04 |
| STEP | 59 | SUM= | 12.679 | DEL= | -0.471E-05 |
| STEP | 60 | SUM= | 12.679 | DEL= | -0.862E-06 |
| STEP | 61 | SUM= | 12.679 | DEL= | -0.437E-06 |
| STEP | 62 | SUM= | 12.679 | DEL= | -0.108E-07 |
| STEP | 63 | SUM= | 12.679 | DEL= | -0.165E-07 |

```

STEP 64 SUM= 12.679 DEL= -0.107E-07
STEP 65 SUM= 12.679 DEL= -0.236E-08
STEP 66 SUM= 12.679 DEL= -0.149E-08
STEP 67 SUM= 12.679 DEL= -0.650E-09
STEP 68 SUM= 12.679 DEL= -0.154E-09
STEP 69 SUM= 12.679 DEL= -0.106E-10
STEP 70 SUM= 12.679 DEL= -0.193E-11
STEP 71 SUM= 12.679 DEL= -0.213E-13
STEP 72 SUM= 12.679 DEL= 0.000E+00

```

```

FINAL SUM= 12.679 CPTS: 2.297 9.055 0.694 0.632

```

```

GRA= 0.36E-08-0.40E-07-0.14E-10-0.28E-08 0.11E-07 0.11E-07 0.12E-08 0.63E-09
GRA= 0.16E-07-0.52E-08 0.19E-09 0.10E-08-0.54E-09 0.64E-07 0.25E-09 0.25E-08
GRA=-0.96E-08-0.83E-08-0.48E-09-0.74E-09-0.50E-08 0.14E-08-0.18E-08-0.24E-09
GRA=-0.74E-08-0.11E-07-0.69E-09 0.13E-09-0.34E-08-0.56E-08-0.72E-11-0.15E-08
GRA= 0.29E-08-0.17E-07 0.28E-08-0.25E-09 0.17E-08-0.30E-08 0.74E-09-0.19E-09
GRA=-0.47E-09 0.43E-08-0.30E-09-0.45E-09 0.38E-09 0.13E-07-0.11E-08 0.27E-08

```

```

-----
|A| Global axis parameters |
-----

```

|        |       |        |        |    |        |       |        |    |       |
|--------|-------|--------|--------|----|--------|-------|--------|----|-------|
| 1) U:  | 0.728 | -0.009 | -0.686 | P: | 30.506 | 0.617 | 9.916  | D: | 0.393 |
| 2) U:  | 0.736 | 0.039  | -0.676 | P: | 32.433 | 0.666 | 7.989  | D: | 0.376 |
| 3) U:  | 0.712 | -0.006 | -0.702 | P: | 34.626 | 0.631 | 5.865  | D: | 2.493 |
| 4) U:  | 0.735 | 0.037  | -0.677 | P: | 36.226 | 0.762 | 3.989  | D: | 2.415 |
| 5) U:  | 0.778 | -0.025 | -0.628 | P: | 38.035 | 0.833 | 2.667  | D: | 0.561 |
| 6) U:  | 0.779 | 0.001  | -0.627 | P: | 40.182 | 0.628 | 0.917  | D: | 0.221 |
| 7) U:  | 0.779 | -0.002 | -0.627 | P: | 42.494 | 0.627 | -0.915 | D: | 0.554 |
| 8) U:  | 0.778 | 0.024  | -0.628 | P: | 44.641 | 0.831 | -2.665 | D: | 2.415 |
| 9) U:  | 0.735 | -0.037 | -0.677 | P: | 46.454 | 0.759 | -3.989 | D: | 2.496 |
| 10) U: | 0.712 | 0.006  | -0.702 | P: | 48.052 | 0.629 | -5.864 | D: | 0.368 |
| 11) U: | 0.736 | -0.039 | -0.676 | P: | 50.241 | 0.664 | -7.988 | D: | 0.387 |
| 12) U: | 0.728 | 0.010  | -0.686 | P: | 52.170 | 0.616 | -9.917 |    |       |

```

-----
|B| Global Base-Axis Parameters |
-----

```

| 1st strand |   | Xdisp<br>(dx) | Ydisp<br>(dy) | Inclin<br>(eta) | Tip<br>(theta) | Bc | Tc  |
|------------|---|---------------|---------------|-----------------|----------------|----|-----|
| 1) CYT     | 1 | -4.20         | 0.53          | 17.12           | -6.82          | 3  | 0   |
| 2) GUA     | 2 | -4.41         | 0.39          | 11.33           | -5.99          | 1  | 13  |
| 3) CYT     | 3 | -4.20         | 0.21          | 10.92           | -4.43          | 3  | -13 |
| 4) GUA     | 4 | -4.53         | 0.58          | 18.55           | 1.22           | 1  | 10  |
| 5) ADE     | 5 | -4.13         | -0.21         | 18.39           | -5.86          | 2  | 18  |



|            |     |    |       |       |        |         |    |     |
|------------|-----|----|-------|-------|--------|---------|----|-----|
| 6)         | ADE | 6  | -4.14 | 0.08  | 20.05  | -12.64  | 2  | 24  |
| 7)         | URI | 7  | -3.93 | 0.09  | 15.50  | -13.23  | 4  | -24 |
| 8)         | URI | 8  | -4.27 | 0.10  | 15.22  | -10.20  | 4  | -28 |
| 9)         | ADE | 9  | -4.40 | 0.55  | 15.89  | -3.41   | 2  | 27  |
| 10)        | GUA | 10 | -4.29 | -0.27 | 16.17  | -10.09  | 1  | 7   |
| 11)        | CYT | 11 | -4.01 | -0.01 | 15.14  | -14.79  | 3  | -13 |
| 12)        | GUA | 12 | -4.24 | -0.09 | 10.10  | -13.00  | 1  | 0   |
| 2nd strand |     |    | Xdisp | Ydisp | Inclin | Tip     | Bc | Tc  |
|            |     |    | (dx)  | (dy)  | (eta)  | (theta) |    |     |
| 1)         | GUA | 24 | -4.24 | -0.10 | 10.11  | -13.00  | 1  | 0   |
| 2)         | CYT | 23 | -4.01 | -0.01 | 15.16  | -14.80  | 3  | -13 |
| 3)         | GUA | 22 | -4.29 | -0.28 | 16.15  | -10.04  | 1  | 7   |
| 4)         | ADE | 21 | -4.40 | 0.55  | 15.90  | -3.39   | 2  | 27  |
| 5)         | URI | 20 | -4.26 | 0.10  | 15.21  | -10.14  | 4  | -28 |
| 6)         | URI | 19 | -3.93 | 0.09  | 15.50  | -13.24  | 4  | -24 |
| 7)         | ADE | 18 | -4.14 | 0.08  | 20.04  | -12.61  | 2  | 24  |
| 8)         | ADE | 17 | -4.13 | -0.21 | 18.40  | -5.89   | 2  | 18  |
| 9)         | GUA | 16 | -4.53 | 0.58  | 18.54  | 1.25    | 1  | 10  |
| 10)        | CYT | 15 | -4.19 | 0.21  | 10.92  | -4.44   | 3  | -13 |
| 11)        | GUA | 14 | -4.40 | 0.39  | 11.35  | -6.00   | 1  | 13  |
| 12)        | CYT | 13 | -4.20 | 0.53  | 17.10  | -6.81   | 3  | 0   |

-----  
|C| Global Base pair-Axis Parameters |  
-----

Strand 1 with strand 2 ...

| Duplex        | Xdisp | Ydisp | Inclin | Tip     | Bc | Tc  |
|---------------|-------|-------|--------|---------|----|-----|
|               | (dx)  | (dy)  | (eta)  | (theta) |    |     |
| 1) C 1-G 24   | -4.22 | 0.31  | 13.61  | 3.09    | 3  | 0   |
| 2) G 2-C 23   | -4.21 | 0.20  | 13.25  | 4.40    | 1  | 13  |
| 3) C 3-G 22   | -4.24 | 0.24  | 13.54  | 2.80    | 3  | -13 |
| 4) G 4-A 21   | -4.46 | 0.02  | 17.22  | 2.30    | 1  | 10  |
| 5) A 5-U 20   | -4.20 | -0.15 | 16.80  | 2.14    | 2  | 18  |
| 6) A 6-U 19   | -4.03 | -0.01 | 17.77  | 0.30    | 2  | 24  |
| 7) U 7-A 18   | -4.03 | 0.01  | 17.77  | -0.31   | 4  | -24 |
| 8) U 8-A 17   | -4.20 | 0.16  | 16.81  | -2.15   | 4  | -28 |
| 9) A 9-G 16   | -4.46 | -0.02 | 17.22  | -2.33   | 2  | 27  |
| 10) G 10-C 15 | -4.24 | -0.24 | 13.55  | -2.82   | 1  | 7   |
| 11) C 11-G 14 | -4.20 | -0.20 | 13.24  | -4.40   | 3  | -13 |
| 12) G 12-C 13 | -4.22 | -0.31 | 13.60  | -3.10   | 1  | 0   |
| Average:      | -4.23 | 0.00  | 15.37  | -0.01   |    |     |

-----  
 |D| Global Base-Base Parameters |  
 -----

Strand 1 with strand 2 ...

| Duplex        | Shear<br>(Sx) | Stretch<br>(Sy) | Stagger<br>(Sz) | Buckle<br>(kappa) | Propel<br>(omega) | Opening<br>(sigma) | Bc | Tc  |
|---------------|---------------|-----------------|-----------------|-------------------|-------------------|--------------------|----|-----|
| 1) C 1-G 24   | 0.04          | 0.44            | -0.08           | 7.00              | -19.82            | 4.18               | 3  | 0   |
| 2) G 2-C 23   | -0.40         | 0.39            | -0.07           | -3.83             | -20.79            | 4.64               | 1  | 13  |
| 3) C 3-G 22   | 0.10          | -0.07           | 0.25            | -5.23             | -14.47            | -1.01              | 3  | -13 |
| 4) G 4-A 21   | -0.14         | 1.13            | 0.11            | 2.65              | -2.17             | -9.55              | 1  | 10  |
| 5) A 5-U 20   | 0.13          | -0.11           | 0.08            | 3.18              | -16.00            | -3.13              | 2  | 18  |
| 6) A 6-U 19   | -0.21         | 0.17            | -0.02           | 4.55              | -25.88            | 1.35               | 2  | 24  |
| 7) U 7-A 18   | 0.21          | 0.17            | -0.03           | -4.54             | -25.85            | 1.36               | 4  | -24 |
| 8) U 8-A 17   | -0.14         | -0.11           | 0.08            | -3.18             | -16.09            | -3.10              | 4  | -28 |
| 9) A 9-G 16   | 0.13          | 1.13            | 0.11            | -2.65             | -2.16             | -9.58              | 2  | 27  |
| 10) G 10-C 15 | -0.10         | -0.07           | 0.25            | 5.26              | -14.53            | -1.01              | 1  | 7   |
| 11) C 11-G 14 | 0.40          | 0.39            | -0.07           | 3.79              | -20.79            | 4.66               | 3  | -13 |
| 12) G 12-C 13 | -0.04         | 0.44            | -0.08           | -7.00             | -19.82            | 4.17               | 1  | 0   |
| Average:      | 0.00          | 0.32            | 0.04            | 0.00              | -16.53            | -0.59              |    |     |

-----  
 |E| Global Inter-Base Parameters |  
 -----

| 1st strand    | Shift<br>(Dx) | Slide<br>(Dy) | Rise<br>(Dz) | Tilt<br>(tau) | Roll<br>(rho) | Twist<br>(Omega) | Dc |
|---------------|---------------|---------------|--------------|---------------|---------------|------------------|----|
| 2) C 1/G 2    | -0.22         | -0.24         | 2.73         | -5.92         | 3.71          | 34.56            | 8  |
| 3) G 2/C 3    | 0.13          | -0.14         | 3.22         | -0.93         | -1.68         | 33.12            | 5  |
| 4) C 3/G 4    | -0.57         | 0.24          | 2.38         | 9.67          | 8.02          | 23.31            | 8  |
| 5) G 4/A 5    | 0.55          | -0.91         | 2.22         | -2.24         | -2.40         | 36.55            | 2  |
| 6) A 5/A 6    | 0.12          | 0.40          | 2.72         | 2.60          | -7.94         | 37.68            | 4  |
| 7) A 6/U 7    | 0.21          | -0.01         | 2.95         | -4.54         | -0.43         | 36.12            | 7  |
| 8) U 7/U 8    | -0.47         | 0.12          | 2.82         | -1.23         | 1.89          | 33.20            | -4 |
| 9) U 8/A 9    | -0.28         | 0.33          | 2.26         | 2.74          | 11.43         | 30.06            | 10 |
| 10) A 9/G 10  | 0.34          | -0.96         | 2.52         | -1.76         | -4.30         | 31.90            | 3  |
| 11) G 10/C 11 | 0.36          | 0.31          | 2.89         | -0.53         | -7.90         | 38.76            | 5  |
| 12) C 11/G 12 | -0.22         | -0.18         | 2.72         | -4.92         | 4.64          | 34.11            | 8  |
| 2nd strand    | Shift<br>(Dx) | Slide<br>(Dy) | Rise<br>(Dz) | Tilt<br>(tau) | Roll<br>(rho) | Twist<br>(Omega) | Dc |
| 2) G 24/C 23  | 0.22          | 0.19          | 2.72         | 4.92          | -4.68         | 34.09            | 8  |
| 3) C 23/G 22  | -0.37         | -0.31         | 2.89         | 0.47          | 8.01          | 38.78            | 5  |

|     |   |      |    |       |       |      |       |        |       |    |
|-----|---|------|----|-------|-------|------|-------|--------|-------|----|
| 4)  | G | 22/A | 21 | -0.34 | 0.96  | 2.53 | 1.80  | 4.28   | 31.85 | 3  |
| 5)  | A | 21/U | 20 | 0.28  | -0.33 | 2.25 | -2.78 | -11.43 | 30.13 | 10 |
| 6)  | U | 20/U | 19 | 0.47  | -0.12 | 2.83 | 1.24  | -1.94  | 33.20 | -4 |
| 7)  | U | 19/A | 18 | -0.21 | 0.01  | 2.95 | 4.54  | 0.46   | 36.11 | 7  |
| 8)  | A | 18/A | 17 | -0.12 | -0.40 | 2.72 | -2.59 | 7.86   | 37.66 | 4  |
| 9)  | A | 17/G | 16 | -0.55 | 0.91  | 2.22 | 2.21  | 2.50   | 36.54 | 2  |
| 10) | G | 16/C | 15 | 0.57  | -0.24 | 2.38 | -9.67 | -8.07  | 23.32 | 8  |
| 11) | C | 15/G | 14 | -0.13 | 0.14  | 3.21 | 0.94  | 1.63   | 33.10 | 5  |
| 12) | G | 14/C | 13 | 0.22  | 0.23  | 2.73 | 5.88  | -3.67  | 34.59 | 8  |

-----  
|F| Global Inter-Base pair Parameters |  
-----

Strand 1 with strand 2 ...

| Duplex        | Shift<br>(Dx) | Slide<br>(Dy) | Rise<br>(Dz) | Tilt<br>(tau) | Roll<br>(rho) | Twist<br>(Omega) | Dc |
|---------------|---------------|---------------|--------------|---------------|---------------|------------------|----|
| 2) C 1/G 2    | 0.00          | -0.21         | 2.72         | -0.50         | 4.20          | 34.32            | 8  |
| 3) G 2/C 3    | -0.12         | 0.09          | 3.05         | -0.23         | -4.84         | 35.95            | 5  |
| 4) C 3/G 4    | -0.45         | -0.36         | 2.45         | 5.74          | 1.87          | 27.58            | 8  |
| 5) G 4/A 5    | 0.42          | -0.29         | 2.24         | -2.51         | 4.52          | 33.34            | 2  |
| 6) A 5/A 6    | 0.29          | 0.26          | 2.77         | 1.92          | -3.00         | 35.44            | 4  |
| 7) A 6/U 7    | 0.00          | -0.01         | 2.95         | 0.00          | -0.45         | 36.12            | 7  |
| 8) U 7/U 8    | -0.29         | 0.26          | 2.77         | -1.91         | -2.98         | 35.43            | -4 |
| 9) U 8/A 9    | -0.42         | -0.29         | 2.24         | 2.47          | 4.47          | 33.30            | 10 |
| 10) A 9/G 10  | 0.46          | -0.36         | 2.45         | -5.72         | 1.89          | 27.61            | 3  |
| 11) G 10/C 11 | 0.12          | 0.08          | 3.05         | 0.21          | -4.77         | 35.93            | 5  |
| 12) C 11/G 12 | 0.00          | -0.21         | 2.73         | 0.48          | 4.16          | 34.35            | 8  |
| Average:      | 0.00          | -0.09         | 2.68         | 0.00          | 0.46          | 33.58            |    |

-----  
|G| Local Inter-Base Parameters |  
-----

| 1st strand | Shift<br>(Dx) | Slide<br>(Dy) | Rise<br>(Dz) | Tilt<br>(tau) | Roll<br>(rho) | Twist<br>(Omega) | Dc |
|------------|---------------|---------------|--------------|---------------|---------------|------------------|----|
| 2) C 1/G 2 | -0.06         | -2.02         | 3.56         | -1.92         | 11.97         | 33.34            | 8  |
| 3) G 2/C 3 | 0.25          | -2.00         | 3.39         | 2.01          | 4.62          | 33.10            | 5  |
| 4) C 3/G 4 | -0.67         | -0.88         | 2.92         | 10.16         | 13.75         | 21.86            | 8  |
| 5) G 4/A 5 | 0.57          | -2.57         | 3.53         | -1.17         | 8.96          | 33.25            | 2  |
| 6) A 5/A 6 | 0.65          | -1.29         | 3.20         | 8.19          | 4.65          | 35.11            | 4  |
| 7) A 6/U 7 | 0.95          | -1.53         | 3.46         | 3.38          | 10.45         | 34.57            | 7  |
| 8) U 7/U 8 | 0.13          | -1.47         | 3.26         | 5.33          | 10.47         | 32.03            | -4 |
| 9) U 8/A 9 | -0.10         | -1.24         | 3.09         | 5.83          | 19.13         | 27.52            | 10 |

|            |   |      |    |               |               |              |               |               |                  |    |
|------------|---|------|----|---------------|---------------|--------------|---------------|---------------|------------------|----|
| 10)        | A | 9/G  | 10 | 0.67          | -2.41         | 3.45         | 1.61          | 4.45          | 30.00            | 3  |
| 11)        | G | 10/C | 11 | 1.10          | -1.66         | 3.07         | 7.58          | 2.73          | 37.45            | 5  |
| 12)        | C | 11/G | 12 | 0.64          | -1.94         | 3.35         | 3.31          | 11.84         | 32.96            | 8  |
| 2nd strand |   |      |    | Shift<br>(Dx) | Slide<br>(Dy) | Rise<br>(Dz) | Tilt<br>(tau) | Roll<br>(rho) | Twist<br>(Omega) | Dc |
| 2)         | G | 24/C | 23 | -0.64         | -1.94         | 3.35         | -3.31         | 11.88         | 32.94            | 8  |
| 3)         | C | 23/G | 22 | -1.10         | -1.65         | 3.07         | -7.62         | 2.63          | 37.48            | 5  |
| 4)         | G | 22/A | 21 | -0.66         | -2.41         | 3.45         | -1.56         | 4.46          | 29.96            | 3  |
| 5)         | A | 21/U | 20 | 0.09          | -1.24         | 3.09         | -5.86         | 19.14         | 27.58            | 10 |
| 6)         | U | 20/U | 19 | -0.13         | -1.47         | 3.26         | -5.31         | 10.52         | 32.04            | -4 |
| 7)         | U | 19/A | 18 | -0.95         | -1.53         | 3.46         | -3.38         | 10.41         | 34.56            | 7  |
| 8)         | A | 18/A | 17 | -0.65         | -1.29         | 3.20         | -8.18         | 4.72          | 35.09            | 4  |
| 9)         | A | 17/G | 16 | -0.57         | -2.57         | 3.53         | 1.14          | 8.87          | 33.25            | 2  |
| 10)        | G | 16/C | 15 | 0.68          | -0.88         | 2.92         | -10.15        | 13.80         | 21.87            | 8  |
| 11)        | C | 15/G | 14 | -0.25         | -2.00         | 3.40         | -2.00         | 4.67          | 33.07            | 5  |
| 12)        | G | 14/C | 13 | 0.06          | -2.02         | 3.56         | 1.88          | 11.93         | 33.37            | 8  |

-----  
|H| Local Inter-Base pair Parameters |  
-----

Strand 1 with strand 2 ...

| Duplex        | Shift<br>(Dx) | Slide<br>(Dy) | Rise<br>(Dz) | Tilt<br>(tau) | Roll<br>(rho) | Twist<br>(Omega) | Dc |
|---------------|---------------|---------------|--------------|---------------|---------------|------------------|----|
| 2) C 1/G 2    | -0.36         | -1.97         | 3.47         | -2.65         | 11.94         | 33.62            | 8  |
| 3) G 2/C 3    | -0.45         | -1.81         | 3.30         | -2.85         | 3.71          | 35.60            | 5  |
| 4) C 3/G 4    | -0.61         | -1.65         | 3.15         | 4.49          | 8.85          | 25.90            | 8  |
| 5) G 4/A 5    | 0.28          | -1.92         | 3.27         | -3.76         | 13.92         | 30.36            | 2  |
| 6) A 5/A 6    | 0.27          | -1.38         | 3.24         | 1.46          | 7.57          | 33.97            | 4  |
| 7) A 6/U 7    | 0.00          | -1.52         | 3.59         | 0.00          | 10.47         | 35.45            | 7  |
| 8) U 7/U 8    | -0.27         | -1.38         | 3.24         | -1.45         | 7.58          | 33.96            | -4 |
| 9) U 8/A 9    | -0.28         | -1.92         | 3.28         | 3.73          | 13.87         | 30.33            | 10 |
| 10) A 9/G 10  | 0.62          | -1.65         | 3.15         | -4.46         | 8.87          | 25.93            | 3  |
| 11) G 10/C 11 | 0.45          | -1.81         | 3.30         | 2.83          | 3.79          | 35.57            | 5  |
| 12) C 11/G 12 | 0.36          | -1.97         | 3.47         | 2.64          | 11.90         | 33.65            | 8  |
| Average:      | 0.00          | -1.73         | 3.31         | 0.00          | 9.32          | 32.21            |    |

-----  
|I| Global Axis Curvature |  
-----

| Duplex | Ax | Ay | Ainc | Atip | Adis | Angle | Path | Dc |
|--------|----|----|------|------|------|-------|------|----|
|--------|----|----|------|------|------|-------|------|----|

|     |   |      |    |       |       |       |       |      |      |      |    |
|-----|---|------|----|-------|-------|-------|-------|------|------|------|----|
| 2)  | C | 1/G  | 2  | -0.01 | -0.10 | -0.13 | 2.88  | 0.10 | 2.89 | 2.73 | 8  |
| 3)  | G | 2/C  | 3  | -0.08 | 0.04  | -0.52 | -3.25 | 0.09 | 3.29 | 3.05 | 5  |
| 4)  | C | 3/G  | 4  | -0.23 | -0.14 | 2.05  | 2.37  | 0.27 | 3.13 | 2.47 | 8  |
| 5)  | G | 4/A  | 5  | 0.15  | -0.11 | -2.09 | 4.68  | 0.19 | 5.12 | 2.24 | 2  |
| 6)  | A | 5/A  | 6  | 0.13  | 0.11  | 0.95  | -1.15 | 0.17 | 1.49 | 2.78 | 4  |
| 7)  | A | 6/U  | 7  | 0.00  | -0.02 | 0.00  | 0.16  | 0.02 | 0.16 | 2.95 | 7  |
| 8)  | U | 7/U  | 8  | -0.13 | 0.11  | -0.95 | -1.14 | 0.17 | 1.48 | 2.78 | -4 |
| 9)  | U | 8/A  | 9  | -0.15 | -0.12 | 2.07  | 4.64  | 0.19 | 5.08 | 2.25 | 10 |
| 10) | A | 9/G  | 10 | 0.24  | -0.14 | -2.05 | 2.38  | 0.27 | 3.14 | 2.47 | 3  |
| 11) | G | 10/C | 11 | 0.08  | 0.04  | 0.51  | -3.19 | 0.09 | 3.23 | 3.05 | 5  |
| 12) | C | 11/G | 12 | 0.01  | -0.10 | 0.12  | 2.85  | 0.10 | 2.86 | 2.73 | 8  |

Overall axis bend ... UU= 1.09 PP= 2.05

| Duplex   | Offset | L.Dir  | ... wrt end-to-end vector |  |
|----------|--------|--------|---------------------------|--|
| 1) C 1   | 0.00   | 0.00   |                           |  |
| 2) G 2   | 0.13   | 80.41  |                           |  |
| 3) C 3   | 0.21   | 28.99  |                           |  |
| 4) G 4   | 0.53   | 17.61  |                           |  |
| 5) A 5   | 0.34   | 4.38   |                           |  |
| 6) A 6   | 0.10   | -66.16 |                           |  |
| 7) U 7   | 0.11   | 65.22  |                           |  |
| 8) U 8   | 0.34   | -0.92  |                           |  |
| 9) A 9   | 0.53   | -7.63  |                           |  |
| 10) G 10 | 0.21   | -27.71 |                           |  |
| 11) C 11 | 0.13   | -84.68 |                           |  |
| 12) G 12 | 0.00   | 0.00   |                           |  |

Path length= 29.49 End-to-end= 29.37 Shortening= 0.39 %

-----  
 |J| Backbone Parameters |  
 -----

| 1st strand | C1'-C2' | C2'-C3' | Phase | Ampli | Pucker   | C1'   | C2'   | C3'   |
|------------|---------|---------|-------|-------|----------|-------|-------|-------|
| 1)CYT 1    | -34.07  | 45.23   | 8.81  | 46.69 | C3'-endo | 106.5 | 101.2 | 98.4  |
| 2)GUA 2    | -34.74  | 45.56   | 8.49  | 47.63 | C3'-endo | 111.7 | 96.9  | 100.2 |
| 3)CYT 3    | -29.78  | 43.77   | 13.36 | 45.31 | C3'-endo | 105.9 | 100.5 | 101.7 |
| 4)GUA 4    | -33.42  | 46.82   | 11.31 | 48.52 | C3'-endo | 105.9 | 99.0  | 99.7  |
| 5)ADE 5    | -26.06  | 41.29   | 19.09 | 44.25 | C3'-endo | 106.6 | 102.1 | 100.5 |
| 6)ADE 6    | -29.34  | 41.39   | 12.65 | 43.53 | C3'-endo | 108.7 | 99.8  | 101.3 |
| 7)URI 7    | -31.25  | 44.02   | 11.34 | 45.09 | C3'-endo | 104.7 | 102.7 | 99.9  |
| 8)URI 8    | -32.03  | 45.86   | 12.92 | 48.08 | C3'-endo | 108.4 | 98.0  | 100.5 |
| 9)ADE 9    | -27.95  | 44.99   | 20.57 | 48.79 | C3'-endo | 102.4 | 102.0 | 97.2  |
| 10)GUA 10  | -30.73  | 42.97   | 11.83 | 44.94 | C3'-endo | 107.0 | 99.3  | 99.9  |

|        |    |        |       |       |       |          |       |       |       |
|--------|----|--------|-------|-------|-------|----------|-------|-------|-------|
| 11)CYT | 11 | -27.91 | 42.04 | 16.01 | 44.38 | C3'-endo | 106.8 | 100.5 | 100.7 |
| 12)GUA | 12 | -24.92 | 40.15 | 20.13 | 43.44 | C3'-endo | 107.7 | 101.1 | 100.6 |

| Torsions |    | Chi     | Gamma   | Delta   | Epsil   | Zeta   | Alpha  | Beta    |
|----------|----|---------|---------|---------|---------|--------|--------|---------|
|          |    | C1'-N   | C5'-C4' | C4'-C3' | C3'-O3' | O3'-P  | P-O5'  | O5'-C5' |
| 1)CYT    | 1  | -164.71 | 60.48   | 78.52   | -156.05 | -71.56 | -65.67 | -179.39 |
| 2)GUA    | 2  | -158.96 | 49.20   | 87.63   | -152.58 | -72.18 | -64.23 | 177.91  |
| 3)CYT    | 3  | -159.80 | 49.36   | 79.74   | -128.42 | -91.12 | -66.23 | 145.28  |
| 4)GUA    | 4  | -165.58 | 53.71   | 78.20   | -159.76 | -61.97 | -68.36 | 179.01  |
| 5)ADE    | 5  | -164.11 | 58.44   | 76.23   | -147.03 | -77.33 | -62.00 | 170.12  |
| 6)ADE    | 6  | -154.65 | 49.95   | 81.10   | -153.32 | -70.97 | -63.12 | 168.76  |
| 7)URI    | 7  | -159.27 | 52.92   | 81.33   | -154.67 | -70.31 | -64.80 | 176.30  |
| 8)URI    | 8  | -154.09 | 46.19   | 85.86   | -138.99 | -77.36 | -77.74 | 162.66  |
| 9)ADE    | 9  | -168.00 | 53.70   | 76.73   | -162.96 | -65.38 | -64.03 | 175.43  |
| 10)GUA   | 10 | -165.57 | 59.45   | 80.58   | -148.08 | -73.36 | -63.23 | 165.89  |
| 11)CYT   | 11 | -162.00 | 55.14   | 83.83   | -149.66 | -70.23 | -61.74 | 173.64  |
| 12)GUA   | 12 | -158.32 | 50.58   | 80.19   | .....   | .....  | .....  | .....   |

| 2nd strand |    | C1'-C2' | C2'-C3' | Phase | Ampli | Pucker   | C1'   | C2'   | C3'   |
|------------|----|---------|---------|-------|-------|----------|-------|-------|-------|
| 1)GUA      | 24 | -24.91  | 40.14   | 20.17 | 43.44 | C3'-endo | 107.6 | 101.1 | 100.6 |
| 2)CYT      | 23 | -27.91  | 42.03   | 16.01 | 44.38 | C3'-endo | 106.8 | 100.5 | 100.6 |
| 3)GUA      | 22 | -30.72  | 42.99   | 11.85 | 44.95 | C3'-endo | 107.1 | 99.3  | 99.9  |
| 4)ADE      | 21 | -28.03  | 45.07   | 20.51 | 48.86 | C3'-endo | 102.4 | 102.0 | 97.2  |
| 5)URI      | 20 | -32.02  | 45.81   | 12.93 | 48.04 | C3'-endo | 108.4 | 98.0  | 100.5 |
| 6)URI      | 19 | -31.25  | 44.02   | 11.34 | 45.09 | C3'-endo | 104.7 | 102.7 | 99.9  |
| 7)ADE      | 18 | -29.34  | 41.39   | 12.65 | 43.53 | C3'-endo | 108.7 | 99.8  | 101.3 |
| 8)ADE      | 17 | -26.08  | 41.29   | 19.08 | 44.25 | C3'-endo | 106.6 | 102.1 | 100.5 |
| 9)GUA      | 16 | -33.45  | 46.87   | 11.29 | 48.56 | C3'-endo | 105.9 | 99.0  | 99.7  |
| 10)CYT     | 15 | -29.80  | 43.78   | 13.34 | 45.31 | C3'-endo | 105.9 | 100.5 | 101.6 |
| 11)GUA     | 14 | -34.71  | 45.57   | 8.51  | 47.62 | C3'-endo | 111.7 | 96.9  | 100.2 |
| 12)CYT     | 13 | -34.06  | 45.25   | 8.81  | 46.69 | C3'-endo | 106.4 | 101.2 | 98.4  |

| Torsions |    | Chi     | Gamma   | Delta   | Epsil   | Zeta   | Alpha  | Beta    |
|----------|----|---------|---------|---------|---------|--------|--------|---------|
|          |    | C1'-N   | C5'-C4' | C4'-C3' | C3'-O3' | O3'-P  | P-O5'  | O5'-C5' |
| 1)GUA    | 24 | -158.35 | 50.60   | 80.19   | .....   | .....  | .....  | .....   |
| 2)CYT    | 23 | -161.97 | 55.25   | 83.76   | -149.68 | -70.21 | -61.76 | 173.68  |
| 3)GUA    | 22 | -165.59 | 59.44   | 80.59   | -148.08 | -73.36 | -63.26 | 165.85  |
| 4)ADE    | 21 | -168.00 | 53.66   | 76.74   | -162.98 | -65.38 | -64.07 | 175.44  |
| 5)URI    | 20 | -154.13 | 46.33   | 85.78   | -139.02 | -77.31 | -77.74 | 162.67  |
| 6)URI    | 19 | -159.27 | 52.88   | 81.33   | -154.67 | -70.31 | -64.86 | 176.27  |
| 7)ADE    | 18 | -154.65 | 49.90   | 81.14   | -153.32 | -70.97 | -63.07 | 168.72  |
| 8)ADE    | 17 | -164.06 | 58.41   | 76.23   | -146.98 | -77.37 | -61.96 | 170.16  |
| 9)GUA    | 16 | -165.59 | 53.71   | 78.20   | -159.73 | -61.99 | -68.32 | 179.00  |
| 10)CYT   | 15 | -159.80 | 49.39   | 79.65   | -128.43 | -91.09 | -66.23 | 145.28  |

11)GUA 14 -158.96 49.12 87.68 -152.54 -72.18 -64.20 177.87  
 12)CYT 13 -164.74 60.43 78.55 -156.00 -71.57 -65.65 -179.36

-----  
 |K| Groove parameters |  
 -----

Atom defining backbone: P 12 levels, 3 sub-levels

| Levels | Minor groove |   |       | Major groove |       |       | Diam |       |       |       |
|--------|--------------|---|-------|--------------|-------|-------|------|-------|-------|-------|
|        | i            | n | Width | Depth        | Angle | Width |      | Depth | Angle |       |
| C      | 1            | 0 | --    | --           | --    | C     | --   | --    | --    |       |
|        | 1            | 1 | --    | --           | --    |       | --   | --    | --    |       |
|        | 1            | 2 | --    | --           | --    |       | --   | --    | --    |       |
| G      | 2            | 0 | --    | --           | --    | G     | --   | --    | --    |       |
|        | 2            | 1 | --    | --           | --    |       | --   | --    | --    |       |
|        | 2            | 2 | 10.32 | 0.92         | 32    |       | --   | --    | --    |       |
|        | 2            | 3 | 10.64 | 0.63         | 33    |       | --   | --    | --    |       |
| C      | 3            | 0 | 10.96 | 0.47         | 29    | C     | --   | --    | --    |       |
|        | 3            | 1 | 11.20 | -0.08        | 31    |       | --   | --    | 18.47 |       |
|        | 3            | 2 | 11.34 | -0.40        | 29    |       | --   | --    | 18.49 |       |
| G      | 4            | 0 | 11.37 | -0.48        | 28    | G     | --   | --    | 18.50 |       |
|        | 4            | 1 | 11.38 | -0.56        | 29    |       | --   | --    | 18.38 |       |
|        | 4            | 2 | 11.30 | -0.29        | 30    |       | --   | --    | 18.27 |       |
| A      | 5            | 0 | 11.15 | 0.13         | 31    | A     | --   | --    | 18.17 |       |
|        | 5            | 1 | 10.89 | 0.41         | 34    |       | 2.42 | 8.88  | 24    | 17.95 |
|        | 5            | 2 | 10.62 | 0.77         | 33    |       | 2.76 | 8.90  | 25    | 17.56 |
| A      | 6            | 0 | 10.35 | 1.27         | 28    | A     | 2.93 | 8.88  | 32    | 17.05 |
|        | 6            | 1 | 10.16 | 1.16         | 29    |       | 3.10 | 9.05  | 31    | 16.63 |
|        | 6            | 2 | 10.17 | 1.09         | 30    |       | 3.10 | 9.05  | 32    | 16.63 |
| U      | 7            | 0 | 10.37 | 1.33         | 28    | U     | 2.92 | 8.81  | 35    | 17.05 |
|        | 7            | 1 | 10.63 | 0.83         | 32    |       | 2.73 | 8.83  | 28    | 17.55 |
|        | 7            | 2 | 10.91 | 0.34         | 35    |       | 2.41 | 8.84  | 26    | 17.95 |
| U      | 8            | 0 | 11.17 | 0.15         | 30    | U     | --   | --    | --    | 18.17 |
|        | 8            | 1 | 11.31 | -0.26        | 29    |       | --   | --    | --    | 18.27 |
|        | 8            | 2 | 11.38 | -0.50        | 28    |       | --   | --    | --    | 18.38 |
| A      | 9            | 0 | 11.38 | -0.54        | 28    | A     | --   | --    | --    | 18.50 |
|        | 9            | 1 | 11.33 | -0.32        | 29    |       | --   | --    | --    | 18.49 |
|        | 9            | 2 | 11.19 | 0.00         | 30    |       | --   | --    | --    | 18.47 |
| G      | 10           | 0 | 10.93 | 0.44         | 30    | G     | --   | --    | --    | --    |
|        | 10           | 1 | 10.60 | 0.71         | 31    |       | --   | --    | --    | --    |
|        | 10           | 2 | 10.28 | 1.00         | 32    |       | --   | --    | --    | --    |
|        | 10           | 3 | --    | --           | --    |       | --   | --    | --    | --    |
| C      | 11           | 0 | --    | --           | --    | C     | --   | --    | --    | --    |
|        | 11           | 1 | --    | --           | --    |       | --   | --    | --    | --    |
|        | 11           | 2 | --    | --           | --    |       | --   | --    | --    | --    |
| G      | 12           | 0 | --    | --           | --    | G     | --   | --    | --    | --    |

**Table 1.** Experimental  $t_m$  and thermodynamic data for melting of r(CGCUAAUUGGCG).

| Experiment                | 0%          | 5%          | 10%         | 15%         | 20%         | $-\Delta H$ (cal/mol)<br>$\delta\alpha/\delta T_m$ | $-\Delta H$ (cal/mol)<br>van't Hoff | $-\Delta S$ (eu)<br>van't Hoff |
|---------------------------|-------------|-------------|-------------|-------------|-------------|----------------------------------------------------|-------------------------------------|--------------------------------|
| <b>Ethylene Glycol</b>    |             |             |             |             |             |                                                    |                                     |                                |
| sm264A                    | 57.1        |             | 56.3        | 54.1        |             | 47614                                              | 47750                               | 119.7                          |
| sm264B1                   | 57.9        | 55.7        | 56.0        | 53.4        | 53.1        | 47057                                              | 47560                               | 119.0                          |
| sm264B2                   | 57.6        | 55.6        | 55.9        | 53.5        | 53.2        | 48564                                              | 47700                               | 119.7                          |
| sm264B3                   |             | 55.5        | 56.0        | 53.7        | 53.0        |                                                    |                                     |                                |
| sm264B4                   |             | 56.5        | 56.3        | 54.2        | 52.8        |                                                    |                                     |                                |
| sm264C                    | 57.7        |             | 56.3        | 53.9        |             | 47045                                              | 47570                               | 119.2                          |
| sm264D1                   | 57.4        |             | 56.6        | 53.8        |             | 46337                                              | 49460                               | 125.0                          |
| sm264D2                   | 57.5        |             | 56.1        | 53.4        | 52.4        | 47262                                              | 49610                               | 125.4                          |
| sm264E1                   | 57.9        | 55.8        | 55.9        | 54.1        | 53.0        | 47215                                              | 47130                               | 117.8                          |
| sm264E2                   |             | 56.0        | 56.2        | 54.1        | 52.9        |                                                    |                                     |                                |
| sm264E3                   | 57.8        | 55.6        | 56.2        | 54.5        | 52.7        | 49667                                              | 52080                               | 132.7                          |
| sm264E4                   |             | 56.3        | 56.3        | 53.5        |             |                                                    |                                     |                                |
| sm264F1                   | 57.9        | 55.7        | 56.0        | 53.5        | 53.1        | 49584                                              | 49780                               | 125.7                          |
| sm264F2                   | 58.1        | 56.3        | 56.3        | 54.2        | 53.1        | 47062                                              | 48420                               | 121.6                          |
| <b>Average</b>            |             | <b>55.9</b> | <b>56.2</b> | <b>53.9</b> | <b>52.9</b> |                                                    |                                     |                                |
| <b>Standard Deviation</b> |             | <b>0.4</b>  | <b>0.2</b>  | <b>0.4</b>  | <b>0.2</b>  |                                                    |                                     |                                |
| <b>Glycerol</b>           |             |             |             |             |             |                                                    |                                     |                                |
| sm276A                    | 57.6        |             |             |             | 53.5        | 51118                                              | 47660                               | 119.6                          |
| sm276B1                   | 57.5        | 56.3        | 55.5        | 55.1        | 53.3        | 49017                                              | 51460                               | 130.9                          |
| sm276B2                   | 57.6        | 56.9        | 55.8        | 54.7        | 53.7        | 48209                                              | 49350                               | 124.5                          |
| sm276B3                   | 57.8        | 56.6        | 55.5        | 55.0        | 53.0        | 47078                                              | 48830                               | 122.7                          |
| sm276B4                   |             | 57.0        | 55.8        | 54.4        | 53.7        |                                                    |                                     |                                |
| sm276C                    | 57.9        | 56.1        | 55.5        | 54.4        |             | 48021                                              | 49440                               | 124.7                          |
| <b>Average</b>            |             | <b>56.6</b> | <b>55.6</b> | <b>54.7</b> | <b>53.4</b> |                                                    |                                     |                                |
| <b>Standard Deviation</b> |             | <b>0.4</b>  | <b>0.2</b>  | <b>0.3</b>  | <b>0.3</b>  |                                                    |                                     |                                |
| <b>Acetamide</b>          |             |             |             |             |             |                                                    |                                     |                                |
| sm279A                    | 57.4        | 55.2        | 53.8        | 51.6        | 49.0        | 45866                                              | 49330                               | 124.5                          |
| sm279B1                   | 57.8        | 55.2        | 53.1        | 51.0        | 49.4        | 48349                                              | 49070                               | 123.6                          |
| sm279B2                   | 57.8        | 54.3        | 52.9        | 50.8        | 48.8        | 51273                                              | 54400                               | 139.7                          |
| sm279B3                   |             | 55.4        | 52.8        | 51.5        | 49.4        |                                                    |                                     |                                |
| sm279B4                   | 57.6        |             | 53.1        | 50.7        | 48.4        | 49531                                              | 49940                               | 126.4                          |
| sm279C                    | 57.9        | 55.3        | 53.0        | 51.5        | 48.8        | 50393                                              | 52600                               | 134.3                          |
| sm279D                    | 57.8        | 55.1        | 53.1        | 50.9        | 48.9        | 47769                                              | 51540                               | 132.0                          |
| sm279E1                   | 57.5        | 54.8        |             | 50.8        | 49.3        | 49893                                              | 52080                               | 132.9                          |
| sm279E2                   | 57.9        | 54.9        |             | 51.0        | 49.2        | 46201                                              | 50700                               | 128.4                          |
| sm279E3                   |             | 54.9        |             | 51.2        | 48.5        |                                                    |                                     |                                |
| <b>Average</b>            |             | <b>55.0</b> | <b>53.1</b> | <b>51.1</b> | <b>49.0</b> |                                                    |                                     |                                |
| <b>Standard Deviation</b> |             | <b>0.3</b>  | <b>0.3</b>  | <b>0.3</b>  | <b>0.4</b>  |                                                    |                                     |                                |
| <b>Total Averages</b>     | <b>57.7</b> |             |             |             |             | <b>48266</b>                                       | <b>49716</b>                        | <b>125.7</b>                   |
| <b>Standard Deviation</b> | <b>0.2</b>  |             |             |             |             | <b>1548</b>                                        | <b>1910</b>                         | <b>6</b>                       |



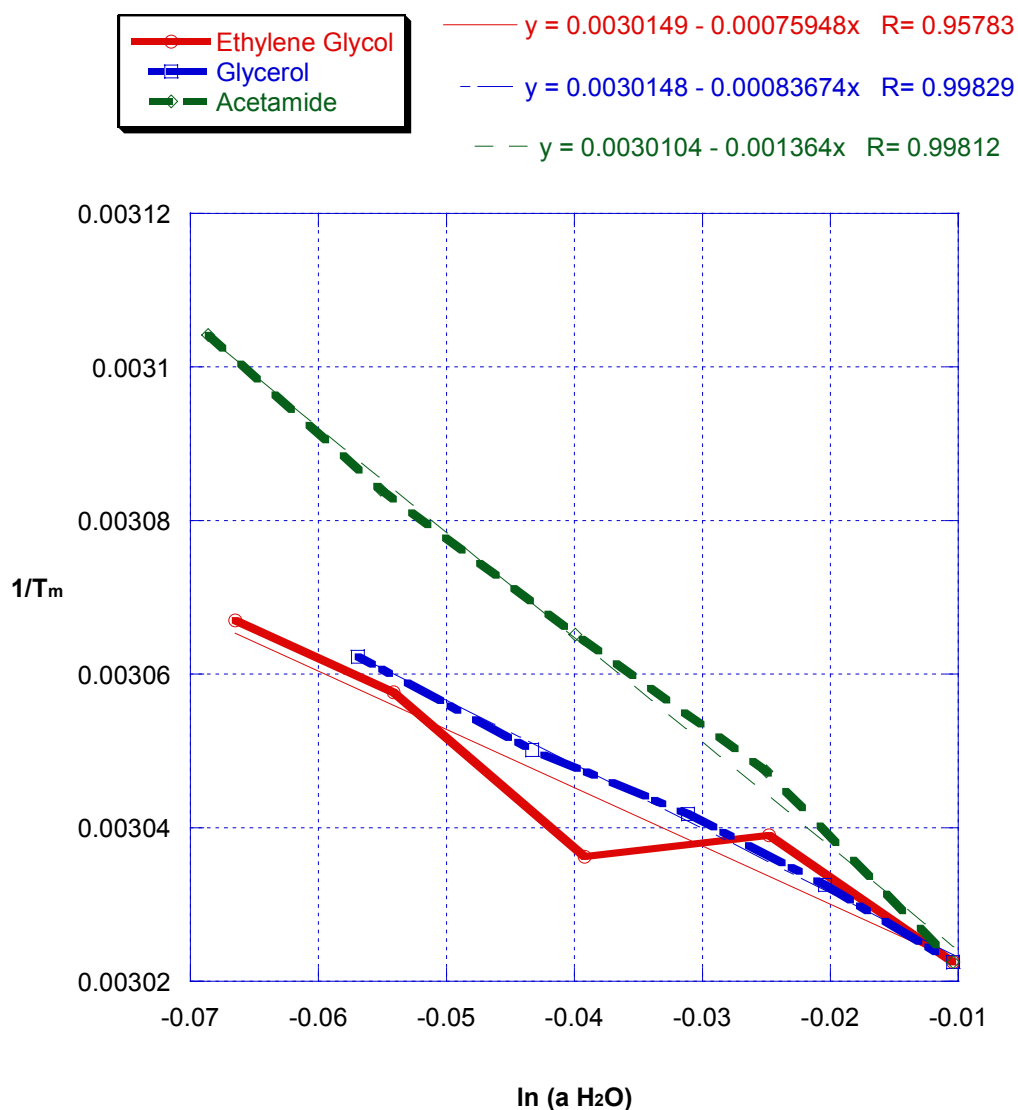

**Figure 1.** Reciprocal temperature of melting for r(CGCUAAUUGGCG) vs. the logarithm of water activity for small cosolutes.

**Table 2.** Calculations for r(CGCUAAUUGGCG).

| Experiments | Cosolute        | $-\Delta H$<br>(cal/mol) | $-\sigma H$ (cal/mol) | -Slope     | $-\sigma$ Slope | $\Delta n_w$ | $\sigma n_w$ |
|-------------|-----------------|--------------------------|-----------------------|------------|-----------------|--------------|--------------|
| sm264       | Ethylene Glycol | 48266                    | 1548                  | 0.00075948 | 0.000119275     | <b>18.5</b>  | <b>3.0</b>   |
| sm276       | Glycerol        | 48266                    | 1548                  | 0.00083674 | 0.000136390     | <b>20.3</b>  | <b>3.4</b>   |
| sm279       | Acetamide       | 48266                    | 1548                  | 0.00136400 | 0.000116300     | <b>33.1</b>  | <b>3.0</b>   |

**Table 3.** Experimental  $t_m$  and thermodynamic data for melting of r(CGCFAAUUGGCG).

| Experiment                | 0%   | 5%          | 10%         | 15%         | 20%         | $-\Delta H$ (cal/mol)<br>$\delta\alpha/\delta T_m$ | $-\Delta H$ (cal/mol)<br>van't Hoff | $-\Delta S$ (eu)<br>van't Hoff |
|---------------------------|------|-------------|-------------|-------------|-------------|----------------------------------------------------|-------------------------------------|--------------------------------|
| <b>Ethylene Glycol</b>    |      |             |             |             |             |                                                    |                                     |                                |
| sm270A1                   | 55.0 | 52.4        | 53.2        | 51.3        | 49.7        | 38548                                              | 43070                               | 106.6                          |
| sm270A2                   | 55.1 | 52.3        | 53.5        | 51.6        | 49.6        | 40367                                              | 44260                               | 110.2                          |
| sm270B1                   |      | 52.2        | 52.7        | 51.3        | 50.3        |                                                    |                                     |                                |
| sm270B2                   |      |             | 52.2        | 51.1        | 50.3        |                                                    |                                     |                                |
| sm270B3                   |      | 52.3        | 52.8        | 51.3        | 49.8        |                                                    |                                     |                                |
| sm270B4                   |      |             | 52.5        | 51.2        | 50.4        |                                                    |                                     |                                |
| sm270C                    | 54.9 | 52.8        | 52.6        | 51.2        | 50.1        | 39339                                              | 39250                               | 95.2                           |
| sm270D1                   | 54.9 | 52.0        | 53.1        | 51.7        | 50.5        | 37650                                              | 39480                               | 95.7                           |
| sm270D2                   | 54.7 | 52.5        | 52.3        | 51.2        | 50.4        | 41835                                              | 43570                               | 108.3                          |
| sm270D3                   |      | 52.0        | 52.4        | 50.6        | 49.8        |                                                    |                                     |                                |
| sm270D4                   |      |             | 52.4        |             | 50.2        |                                                    |                                     |                                |
| sm270E                    |      | 52.9        |             |             |             |                                                    |                                     |                                |
| <b>Average</b>            |      | <b>52.4</b> | <b>52.7</b> | <b>51.3</b> | <b>50.1</b> |                                                    |                                     |                                |
| <b>Standard Deviation</b> |      | <b>0.3</b>  | <b>0.4</b>  | <b>0.3</b>  | <b>0.3</b>  |                                                    |                                     |                                |
| <b>Glycerol</b>           |      |             |             |             |             |                                                    |                                     |                                |
| sm273A                    | 54.8 | 53.9        |             | 49.7        | 49.0        | 42305                                              | 45370                               | 113.6                          |
| sm273B1                   |      | 53.2        | 52.8        |             |             |                                                    |                                     |                                |
| sm273B2                   | 54.8 | 53.7        | 52.0        | 50.1        | 49.1        | 42662                                              | 44470                               | 111.0                          |
| sm273B3                   |      |             | 52.9        |             | 48.9        |                                                    |                                     |                                |
| sm273C                    |      | 53.9        | 52.5        | 50.1        |             |                                                    |                                     |                                |
| sm273D1                   | 55.4 | 53.1        | 52.9        |             |             | 43311                                              | 45170                               | 112.8                          |
| sm273D2                   | 54.9 |             | 52.1        | 50.1        |             | 41602                                              | 43340                               | 107.4                          |
| sm273D3                   | 54.6 | 53.0        |             |             |             | 42586                                              | 45180                               | 113.2                          |
| sm273D4                   |      |             | 52.6        | 49.7        | 48.3        |                                                    |                                     |                                |
| sm273E1                   | 54.9 |             |             |             | 48.9        | 44274                                              | 42560                               | 105.1                          |
| sm273E2                   |      | 53.6        | 52.6        | 50.3        | 49.1        |                                                    |                                     |                                |
| <b>Average</b>            |      | <b>53.5</b> | <b>52.6</b> | <b>50.0</b> | <b>48.9</b> |                                                    |                                     |                                |
| <b>Standard Deviation</b> |      | <b>0.4</b>  | <b>0.3</b>  | <b>0.2</b>  | <b>0.3</b>  |                                                    |                                     |                                |
| <b>Acetamide</b>          |      |             |             |             |             |                                                    |                                     |                                |
| sm284A                    | 55.2 | 52.3        | 50.5        | 48.0        | 46.7        | 39738                                              | 45070                               | 112.6                          |
| sm284B1                   | 55.1 | 52.1        | 50.8        | 47.7        | 46.3        | 39891                                              | 42870                               | 106.0                          |
| sm284B2                   |      | 52.3        | 50.5        | 47.4        | 45.8        |                                                    |                                     |                                |
| sm284B3                   |      |             |             |             |             |                                                    |                                     |                                |
| sm284B4                   |      |             | 51.1        | 47.1        | 46.7        |                                                    |                                     |                                |
| sm284C1                   | 54.7 |             | 51.2        |             | 46.2        | 40112                                              | 38660                               | 93.4                           |
| sm284C2                   | 54.6 |             | 50.3        |             | 46.8        | 39519                                              | 38380                               | 92.5                           |
| sm284D1                   | 55.1 | 52.8        | 51.1        | 47.4        | 46.9        | 37571                                              | 40440                               | 98.5                           |
| sm284D2                   |      | 52.3        | 51.1        | 47.4        | 46.5        |                                                    |                                     |                                |
| sm284D3                   |      | 52.6        | 51.5        | 47.6        | 46.8        |                                                    |                                     |                                |
| sm284E1                   |      | 52.4        | 51.1        |             | 46.2        |                                                    |                                     |                                |

|                           |             |             |             |             |              |              |              |
|---------------------------|-------------|-------------|-------------|-------------|--------------|--------------|--------------|
| sm284E2                   | 52.8        | 51.1        | 47.4        | 46.7        |              |              |              |
| sm284F                    |             |             |             | 46.4        |              |              |              |
| <b>Average</b>            | <b>52.5</b> | <b>50.9</b> | <b>47.5</b> | <b>46.5</b> |              |              |              |
| <b>Standard Deviation</b> | <b>0.3</b>  | <b>0.4</b>  | <b>0.3</b>  | <b>0.3</b>  |              |              |              |
| <b>Total Averages</b>     | <b>54.9</b> |             |             |             | <b>40707</b> | <b>42571</b> | <b>105.1</b> |
| <b>Standard Deviation</b> | <b>0.2</b>  |             |             |             | <b>2011</b>  | <b>2504</b>  | <b>8</b>     |

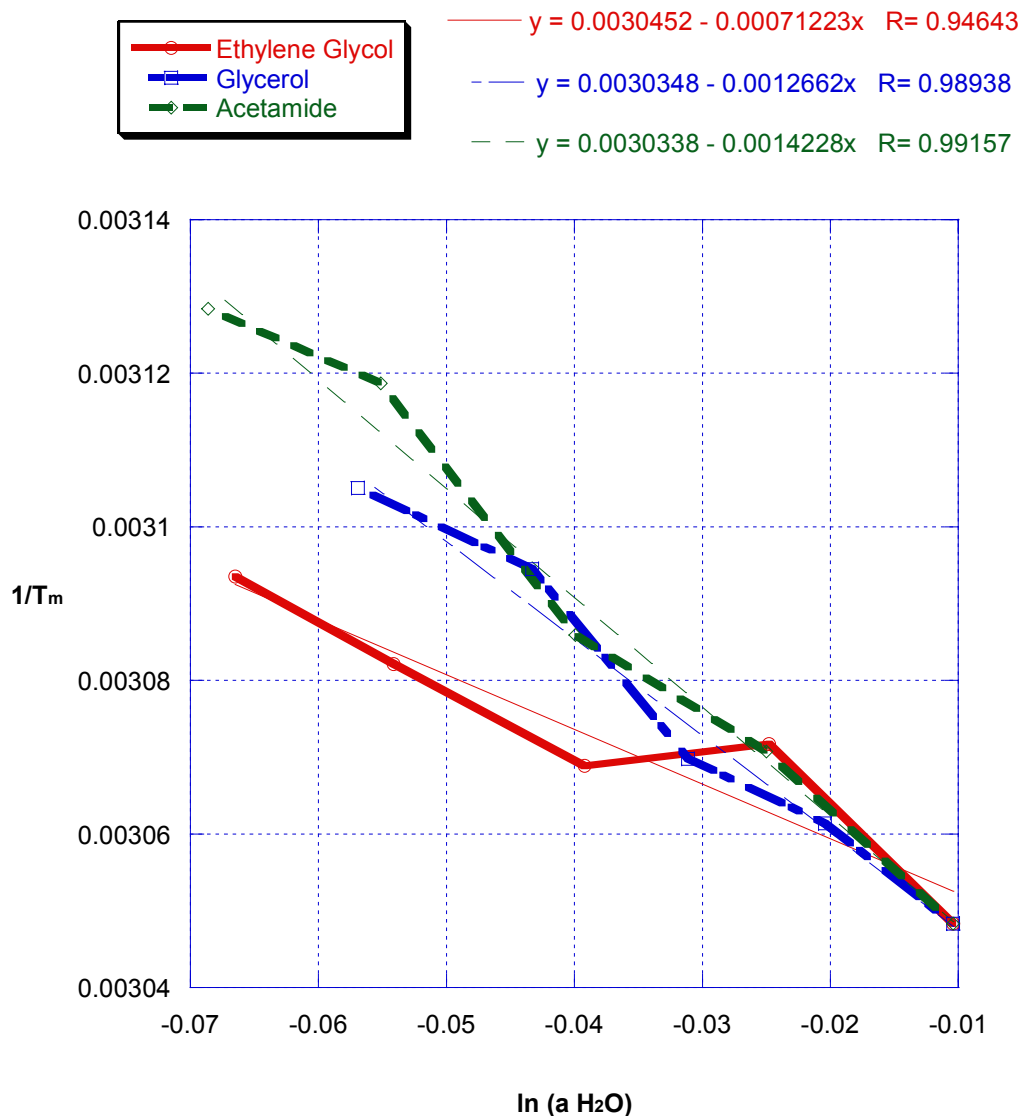

**Figure 2.** Reciprocal temperature of melting for r(CGCFAAUUGGCG) vs. the logarithm of water activity for small cosolutes.

**Table 4.** Calculations for r(CGCFAAUUGGCG).

| Experiments | Cosolute        | $-\Delta H$<br>(cal/mol) | $-\sigma H$ (cal/mol) | -Slope     | $-\sigma$ Slope | $\Delta n_w$ | $\sigma n_w$ |
|-------------|-----------------|--------------------------|-----------------------|------------|-----------------|--------------|--------------|
| sm270       | Ethylene Glycol | 40707                    | 2011                  | 0.00071223 | 0.000094250     | <b>14.6</b>  | <b>2.1</b>   |
| sm273       | Glycerol        | 40707                    | 2011                  | 0.00126620 | 0.000147550     | <b>26.0</b>  | <b>3.3</b>   |
| sm284       | Acetamide       | 40707                    | 2011                  | 0.00142280 | 0.000095350     | <b>29.2</b>  | <b>2.4</b>   |

**Table 5.** Experimental  $t_m$  and thermodynamic data for melting of r(CGCGAAUUF $\overline{GCG}$ ).

| Experiment                | 0%   | 5%          | 10%         | 15%         | 20%         | $-\Delta H$ (cal/mol)<br>$\delta\alpha/\delta T_m$ | $-\Delta H$ (cal/mol)<br>van't Hoff | $-\Delta S$ (eu)<br>van't Hoff |
|---------------------------|------|-------------|-------------|-------------|-------------|----------------------------------------------------|-------------------------------------|--------------------------------|
| <b>Ethylene Glycol</b>    |      |             |             |             |             |                                                    |                                     |                                |
| sm266A1                   | 53.8 | 51.7        |             | 50.5        | 49.9        | 42524                                              | 41790                               | 103.3                          |
| sm266A2                   | 53.7 | 52.7        | 52.2        | 50.8        | 50.4        | 42897                                              | 43990                               | 110.0                          |
| sm266B                    | 54.1 | 52.0        | 51.6        | 50.5        | 50.0        | 43331                                              | 38780                               | 94.1                           |
| sm266C1                   | 53.4 | 52.7        | 52.6        | 51.0        |             | 43513                                              | 44850                               | 112.7                          |
| sm266C2                   |      |             |             | 50.8        | 50.4        |                                                    |                                     |                                |
| sm266C3                   | 53.7 |             | 52.8        | 50.6        | 49.8        | 44344                                              | 46310                               | 117.0                          |
| sm266D1                   | 53.7 | 52.1        | 52.6        | 50.8        | 50.1        | 43663                                              | 45300                               | 114.0                          |
| sm266D2                   | 53.8 | 52.0        | 52.7        | 51.2        |             | 45332                                              | 42100                               | 104.3                          |
| sm266E                    | 53.8 | 52.7        | 52.5        | 50.7        | 50.1        | 47121                                              | 47890                               | 121.9                          |
| sm266F1                   | 53.6 | 52.6        | 52.9        | 50.7        |             | 45002                                              | 49900                               | 128.1                          |
| sm266F2                   | 54.5 | 53.0        |             |             | 49.7        | 44079                                              | 44820                               | 112.3                          |
| sm266F3                   |      | 52.8        | 53.0        | 51.0        | 50.1        |                                                    |                                     |                                |
| sm266F4                   | 54.3 | 52.6        |             | 50.8        |             | 46017                                              | 44590                               | 111.6                          |
| <b>Average</b>            |      | <b>52.4</b> | <b>52.5</b> | <b>50.8</b> | <b>50.1</b> |                                                    |                                     |                                |
| <b>Standard Deviation</b> |      | <b>0.4</b>  | <b>0.4</b>  | <b>0.2</b>  | <b>0.2</b>  |                                                    |                                     |                                |
| <b>Glycerol</b>           |      |             |             |             |             |                                                    |                                     |                                |
| sm277A                    | 54.1 | 52.4        |             |             |             | 44354                                              | 43830                               | 109.3                          |
| sm277B1                   | 53.4 | 52.0        | 50.9        |             |             | 39944                                              | 39500                               | 96.4                           |
| sm277B2                   |      | 52.6        | 50.7        |             |             |                                                    |                                     |                                |
| sm277B3                   |      |             |             |             |             |                                                    |                                     |                                |
| sm277B4                   |      |             |             | 51.0        | 50.3        | 48.6                                               |                                     |                                |
| sm277C1                   | 54.2 | 52.3        | 51.1        | 49.4        |             | 44983                                              | 45840                               | 115.4                          |
| sm277C2                   | 54.1 | 52.5        | 51.3        |             | 48.2        | 44478                                              | 47770                               | 121.3                          |
| sm277C3                   |      |             | 50.8        | 49.3        | 48.0        |                                                    |                                     |                                |
| sm277C4                   |      | 52.9        | 50.7        | 50.0        |             |                                                    |                                     |                                |
| sm277D1                   | 53.7 | 51.8        | 51.2        | 49.5        | 48.7        | 44126                                              | 47010                               | 119.0                          |
| sm277D2                   |      |             |             | 49.2        | 48.4        |                                                    |                                     |                                |
| <b>Average</b>            |      | <b>52.4</b> | <b>51.0</b> | <b>49.6</b> | <b>48.4</b> |                                                    |                                     |                                |
| <b>Standard Deviation</b> |      | <b>0.4</b>  | <b>0.2</b>  | <b>0.4</b>  | <b>0.3</b>  |                                                    |                                     |                                |
| <b>Acetamide</b>          |      |             |             |             |             |                                                    |                                     |                                |
| sm283A                    | 54.2 | 51.4        | 49.2        | 47.7        | 45.6        | 44158                                              | 44600                               | 111.6                          |
| sm283B                    | 54.2 | 51.0        | 49.0        | 46.9        | 45.5        | 40882                                              | 43400                               | 108.0                          |
| sm283C1                   | 53.5 | 50.7        | 49.2        | 47.2        | 45.0        | 42126                                              | 42750                               | 106.2                          |
| sm283C2                   |      | 50.5        | 49.5        | 47.7        | 45.6        |                                                    |                                     |                                |
| sm283C3                   |      | 50.8        | 49.6        |             | 45.4        |                                                    |                                     |                                |
| sm283C4                   |      |             | 49.9        | 46.9        | 45.0        |                                                    |                                     |                                |
| sm283D                    |      | 51.2        | 49.3        |             | 45.8        |                                                    |                                     |                                |
| sm283E                    | 53.3 |             | 49.3        | 47.5        |             | 41192                                              | 47080                               | 119.5                          |
| sm283F1                   | 54.0 | 50.8        |             | 47.0        |             | 41357                                              | 51700                               | 133.3                          |
| sm283F2                   |      |             | 49.6        | 47.4        | 45.1        |                                                    |                                     |                                |

|                           |             |             |             |             |              |              |              |
|---------------------------|-------------|-------------|-------------|-------------|--------------|--------------|--------------|
| sm283F3                   |             | 49.3        | 47.0        | 45.0        |              |              |              |
| sm283F4                   | 51.1        |             | 47.2        | 45.8        |              |              |              |
| sm283G                    |             |             |             |             |              |              |              |
| <b>Average</b>            | <b>50.9</b> | <b>49.4</b> | <b>47.3</b> | <b>45.4</b> |              |              |              |
| <b>Standard Deviation</b> | <b>0.3</b>  | <b>0.3</b>  | <b>0.3</b>  | <b>0.3</b>  |              |              |              |
| <b>Total Averages</b>     | <b>53.9</b> |             |             |             | <b>43592</b> | <b>44943</b> | <b>112.8</b> |
| <b>Standard Deviation</b> | <b>0.3</b>  |             |             |             | <b>1779</b>  | <b>3113</b>  | <b>9</b>     |

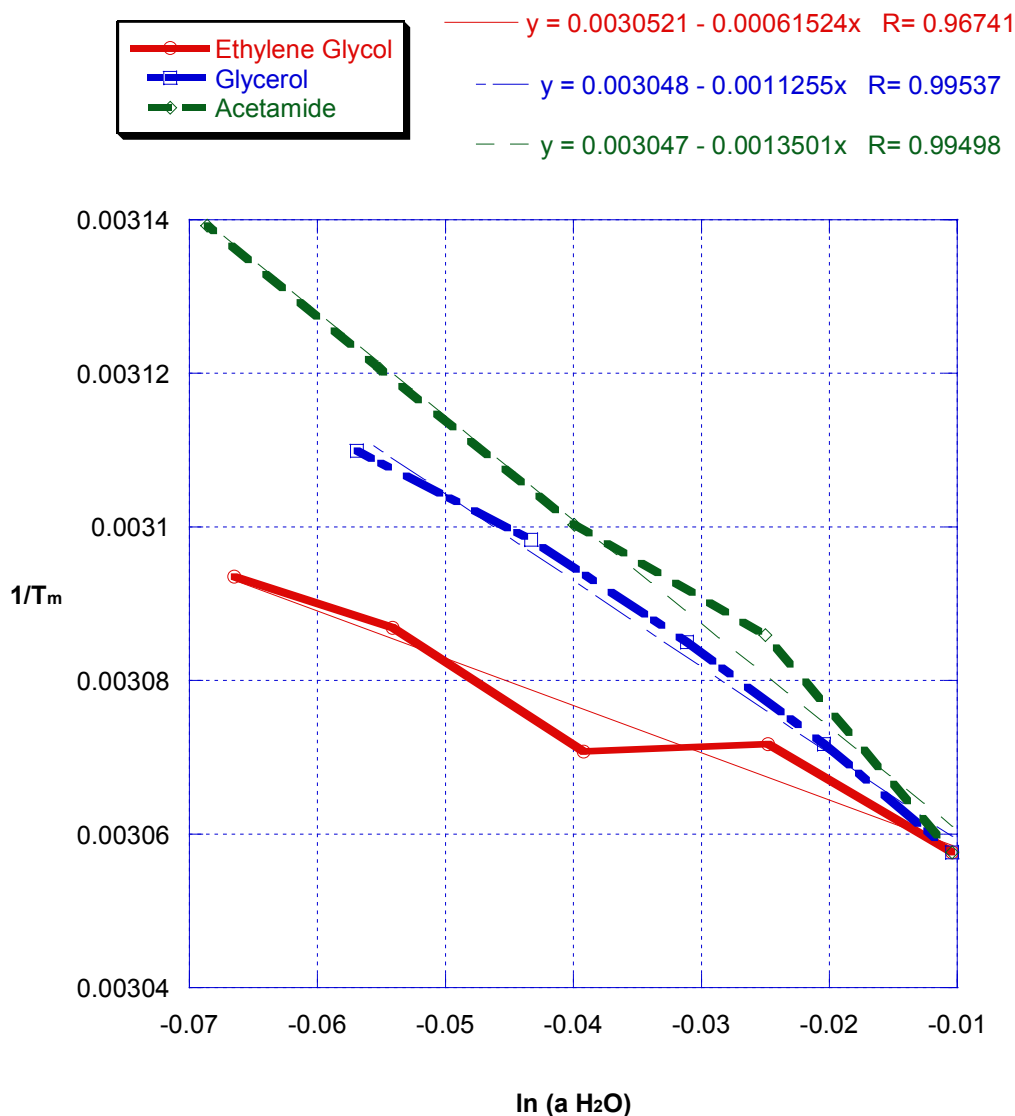

**Figure 3.** Reciprocal temperature of melting for r(CGCGAAUUFGCG) vs. the logarithm of water activity for small cosolutes.

**Table 6.** Calculations for r(CGCGAAUUFGCG).

| Experiments | Cosolute        | $-\Delta H$<br>(cal/mol) | $-\sigma H$ (cal/mol) | $-\text{Slope}$ | $-\sigma \text{Slope}$ | $\Delta n_w$ | $\sigma n_w$ |
|-------------|-----------------|--------------------------|-----------------------|-----------------|------------------------|--------------|--------------|
| sm266       | Ethylene Glycol | 43592                    | 1779                  | 0.00061524      | 0.000107335            | <b>13.5</b>  | <b>2.4</b>   |
| sm277       | Glycerol        | 43592                    | 1779                  | 0.0011255       | 0.000163285            | <b>24.7</b>  | <b>3.7</b>   |
| sm283       | Acetamide       | 43592                    | 1779                  | 0.0013501       | 0.000131400            | <b>29.6</b>  | <b>3.1</b>   |

**Table 7.** Experimental  $t_m$  and thermodynamic data for melting of r(CGCFAAUUAGCG).

| Experiment                | 0%   | 5%          | 10%         | 15%         | 20%         | $-\Delta H$ (cal/mol)<br>$\delta\alpha/\delta T_m$ | $-\Delta H$ (cal/mol)<br>van't Hoff | $-\Delta S$ (eu)<br>van't Hoff |
|---------------------------|------|-------------|-------------|-------------|-------------|----------------------------------------------------|-------------------------------------|--------------------------------|
| <b>Glycerol</b>           |      |             |             |             |             |                                                    |                                     |                                |
| sm268A                    | 53.7 | 51.9        | 51.5        | 49.8        |             | 37295                                              | 39410                               | 96.0                           |
| sm268B                    | 53.4 | 51.6        | 51.4        | 49.9        |             | 38246                                              | 40260                               | 98.7                           |
| sm268C                    | 52.9 | 52.2        |             | 49.6        |             | 37238                                              | 40490                               | 99.6                           |
| sm268D1                   | 53.3 | 52.5        | 51.8        | 50.8        | 49.6        |                                                    | 40130                               | 98.3                           |
| sm268D2                   |      | 51.6        | 51.6        | 49.7        | 48.9        |                                                    |                                     |                                |
| sm268D3                   |      | 52.6        | 51.6        | 50.1        | 48.2        |                                                    |                                     |                                |
| sm268E1                   | 53.0 | 51.9        | 51.9        | 49.7        | 48.8        | 35024                                              | 38650                               | 93.9                           |
| sm268E2                   | 53.4 | 52.1        |             | 50.2        | 49.0        | 36512                                              | 36860                               | 88.5                           |
| sm268E3                   |      |             |             | 49.9        | 49.3        |                                                    |                                     |                                |
| sm268F1                   | 52.9 | 51.1        | 51.2        |             | 49.8        | 37358                                              | 35880                               | 85.6                           |
| sm268F2                   |      | 51.8        | 51.6        | 49.3        | 49.1        |                                                    |                                     |                                |
| sm268F3                   |      |             |             |             | 49.0        |                                                    |                                     |                                |
| sm268F4                   |      |             | 51.2        |             | 48.7        |                                                    |                                     |                                |
| sm268G                    | 53.0 |             | 51.8        |             | 49.2        | 34698                                              | 39250                               | 95.6                           |
| <b>Average</b>            |      | <b>51.9</b> | <b>51.6</b> | <b>49.9</b> | <b>49.1</b> |                                                    |                                     |                                |
| <b>Standard Deviation</b> |      | <b>0.4</b>  | <b>0.2</b>  | <b>0.4</b>  | <b>0.4</b>  |                                                    |                                     |                                |
| <b>Glycerol</b>           |      |             |             |             |             |                                                    |                                     |                                |
| sm278A                    | 53.3 | 52.4        |             |             |             | 38629                                              | 43350                               | 108.1                          |
| sm278B1                   | 52.9 | 52.3        | 52.7        | 51.0        |             | 39662                                              | 39750                               | 97.3                           |
| sm278B2                   | 52.7 | 51.6        |             |             | 50.0        | 44676                                              | 43490                               | 108.4                          |
| sm278B3                   | 53.1 |             | 52.0        | 51.3        |             | 43408                                              | 41590                               | 102.9                          |
| sm278B4                   |      |             |             | 50.7        | 49.7        |                                                    |                                     |                                |
| sm278C                    | 53.9 | 52.1        | 52.6        |             | 49.8        | 37346                                              | 42640                               | 105.7                          |
| sm278D                    | 53.2 | 52.4        |             |             |             | 46880                                              | 43800                               | 109.6                          |
| sm278E1                   |      |             | 52.4        | 50.8        |             |                                                    |                                     |                                |
| sm278E2                   |      | 52.6        | 52.6        | 51.4        | 49.9        |                                                    |                                     |                                |
| sm278E3                   |      | 52.3        |             |             | 49.1        |                                                    |                                     |                                |
| sm278E4                   |      |             |             |             | 50.0        |                                                    |                                     |                                |
| <b>Average</b>            |      | <b>52.2</b> | <b>52.5</b> | <b>51.0</b> | <b>49.8</b> |                                                    |                                     |                                |
| <b>Standard Deviation</b> |      | <b>0.3</b>  | <b>0.3</b>  | <b>0.3</b>  | <b>0.3</b>  |                                                    |                                     |                                |
| <b>Acetamide</b>          |      |             |             |             |             |                                                    |                                     |                                |
| sm285A1                   | 53.1 | 50.7        | 48.9        | 47.6        | 45.4        | 35952                                              | 39890                               | 97.6                           |
| sm285A2                   | 52.9 | 50.9        | 49.5        | 46.5        | 45.7        | 38295                                              | 42480                               | 105.6                          |
| sm285B1                   |      |             | 49.3        | 47.4        |             |                                                    |                                     |                                |
| sm285B2                   |      | 50.7        | 48.9        | 46.7        | 45.2        |                                                    |                                     |                                |
| sm285B3                   |      | 50.5        | 48.7        | 47.4        | 46.0        |                                                    |                                     |                                |
| sm285B4                   |      | 50.2        | 48.9        | 47.2        | 45.6        |                                                    |                                     |                                |
| sm285C1                   | 53.1 | 50.2        |             | 47.0        | 45.8        | 34755                                              | 39660                               | 96.9                           |
| sm285C2                   | 53.2 |             | 49.9        | 46.7        |             | 33911                                              | 42820                               | 106.5                          |
| sm285D1                   |      | 50.8        | 48.8        | 47.2        | 45.4        |                                                    |                                     |                                |

|                           |             |             |             |             |              |              |             |       |
|---------------------------|-------------|-------------|-------------|-------------|--------------|--------------|-------------|-------|
| sm285D2                   | 50.3        | 48.9        | 47.0        |             |              |              |             |       |
| sm285D3                   | 50.4        |             | 47.1        | 45.5        |              |              |             |       |
| sm285D4                   |             | 49.3        | 46.8        | 46.2        |              |              |             |       |
| sm285E1                   | 53.5        | 51.1        | 46.9        |             | 37940        | 39620        | 96.7        |       |
| sm285E2                   | 53.3        | 50.6        | 49.6        | 47.1        | 45.6         | 38341        | 41820       | 103.4 |
| sm285F                    | 53.0        |             | 48.9        |             |              | 36999        | 41150       | 101.5 |
| sm285G                    | 53.1        |             | 48.9        | 46.7        | 45.4         | 37034        | 40720       | 100.1 |
| sm285H1                   |             | 51.3        | 49.2        | 47.1        | 45.2         |              |             |       |
| sm285H2                   |             |             | 48.9        | 47.5        |              |              |             |       |
| sm285H3                   |             |             |             | 47.2        | 46.0         |              |             |       |
| <b>Average</b>            | <b>50.6</b> | <b>49.1</b> | <b>47.1</b> | <b>45.6</b> |              |              |             |       |
| <b>Standard Deviation</b> | <b>0.3</b>  | <b>0.3</b>  | <b>0.3</b>  | <b>0.3</b>  |              |              |             |       |
| <b>Total Averages</b>     | <b>53.2</b> |             |             |             | <b>38105</b> | <b>40623</b> | <b>99.8</b> |       |
| <b>Standard Deviation</b> | <b>0.3</b>  |             |             |             | <b>3264</b>  | <b>2050</b>  | <b>6</b>    |       |

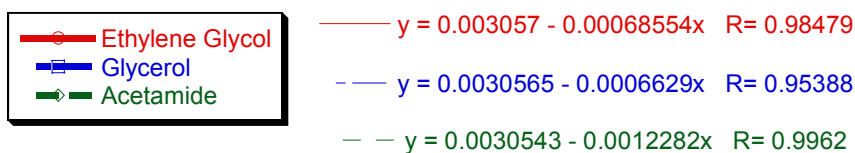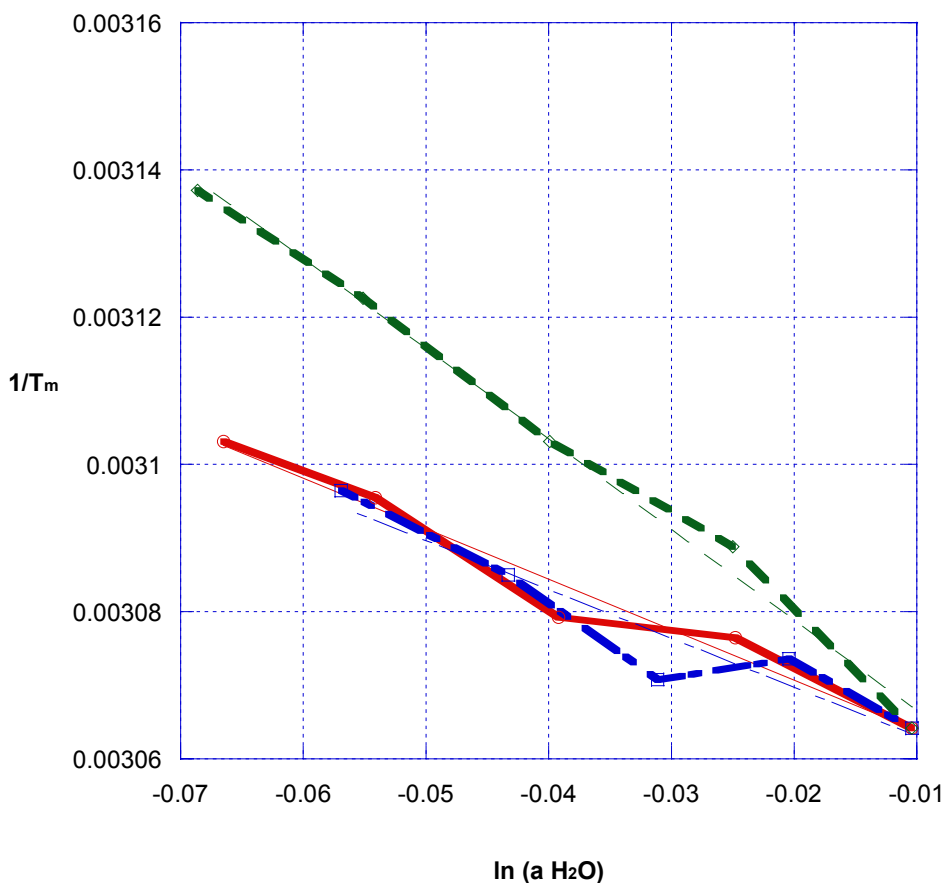

**Figure 4.** Reciprocal temperature of melting for r(CGCFAAUUAGCG) vs. the logarithm of water activity for small cosolutes.

**Table 8.** Calculations for r(CGCFAAUUAGCG).

| Experiments | Cosolute        | $-\Delta H$<br>(cal/mol) | $-\sigma H$ (cal/mol) | $-\text{Slope}$ | $-\sigma \text{Slope}$ | $\Delta n_w$ | $\sigma n_w$ |
|-------------|-----------------|--------------------------|-----------------------|-----------------|------------------------|--------------|--------------|
| sm268       | Ethylene Glycol | 38105                    | 3264                  | 0.00068554      | 0.000148805            | <b>13.2</b>  | <b>3.1</b>   |
| sm278       | Glycerol        | 38105                    | 3264                  | 0.0006629       | 0.000162285            | <b>12.7</b>  | <b>3.3</b>   |
| sm285       | Acetamide       | 38105                    | 3264                  | 0.0012282       | 0.000105900            | <b>23.6</b>  | <b>2.9</b>   |

**Table 9.** Experimental  $t_m$  and thermodynamic data for melting of r(CGCGAAUUAGCG).

| Experiment                | 0%          | 5%          | 10%         | 15%         | 20%         | $-\Delta H$ (cal/mol)<br>$\delta\alpha/\delta T_m$ | $-\Delta H$ (cal/mol)<br>van't Hoff | $-\Delta S$ (eu)<br>van't Hoff |
|---------------------------|-------------|-------------|-------------|-------------|-------------|----------------------------------------------------|-------------------------------------|--------------------------------|
| <b>Ethylene Glycol</b>    |             |             |             |             |             |                                                    |                                     |                                |
| md115A1                   |             | 56.5        |             | 54.6        |             |                                                    |                                     |                                |
| md115A2                   | 58.1        | 57.0        | 55.2        | 54.2        | 53.1        | 50082                                              | 56180                               | 145.1                          |
| md115B1                   | 58.4        | 57.1        | 55.6        | 54.1        |             | 48099                                              | 53160                               | 135.6                          |
| md115B2                   |             | 57.3        |             | 54.7        | 52.6        |                                                    |                                     |                                |
| md115B3                   | 57.9        | 56.5        |             | 54.3        | 53.2        | 55782                                              | 57030                               | 147.5                          |
| md115B4                   |             |             | 56.0        | 54.5        | 53.3        |                                                    |                                     |                                |
| md115C                    |             | 56.5        |             | 54.6        | 53.3        |                                                    |                                     |                                |
| md115D1                   | 58.2        | 56.5        | 55.9        |             | 52.8        | 50765                                              | 58820                               | 152.8                          |
| md115D2                   |             |             | 55.1        | 54.0        | 53.0        |                                                    |                                     |                                |
| md115D3                   | 58.5        |             |             | 54.4        | 52.8        | 51419                                              | 60860                               | 158.8                          |
| md115D4                   |             | 56.6        |             |             |             |                                                    |                                     |                                |
| md115D5                   |             |             | 55.7        | 55.1        | 52.9        |                                                    |                                     |                                |
| <b>Average</b>            |             | <b>56.8</b> | <b>55.6</b> | <b>54.5</b> | <b>53.0</b> |                                                    |                                     |                                |
| <b>Standard Deviation</b> |             | <b>0.3</b>  | <b>0.4</b>  | <b>0.3</b>  | <b>0.2</b>  |                                                    |                                     |                                |
| <b>Glycerol</b>           |             |             |             |             |             |                                                    |                                     |                                |
| md116A2                   | 58.0        | 57.1        | 55.8        | 54.3        |             | 49259                                              | 55580                               | 143.2                          |
| md116A3                   | 58.3        |             | 55.5        | 54.8        |             | 53256                                              | 57230                               | 148.0                          |
| md116B1                   | 58.3        | 57.4        |             | 54.8        |             | 49184                                              | 51100                               | 129.4                          |
| md116B2                   | 58.0        | 57.2        | 55.7        | 55.0        | 53.8        | 52112                                              | 56880                               | 147.1                          |
| md116B3                   |             | 57.1        |             |             | 53.1        |                                                    |                                     |                                |
| md116B4                   | 58.5        | 57.2        | 55.9        | 54.8        | 53.5        | 48381                                              | 55750                               | 143.3                          |
| md116D1                   |             |             | 56.2        |             | 53.5        |                                                    |                                     |                                |
| md116D2                   |             |             | 56.7        |             | 53.8        |                                                    |                                     |                                |
| md116D3                   |             |             | 56.5        |             | 54.1        |                                                    |                                     |                                |
| <b>Average</b>            |             | <b>57.2</b> | <b>56.0</b> | <b>54.7</b> | <b>53.6</b> |                                                    |                                     |                                |
| <b>Standard Deviation</b> |             | <b>0.1</b>  | <b>0.4</b>  | <b>0.3</b>  | <b>0.3</b>  |                                                    |                                     |                                |
| <b>Total Averages</b>     | <b>58.2</b> |             |             |             |             | <b>50834</b>                                       | <b>56259</b>                        | <b>145.1</b>                   |
| <b>Standard Deviation</b> | <b>0.2</b>  |             |             |             |             | <b>2394</b>                                        | <b>2720</b>                         | <b>8</b>                       |



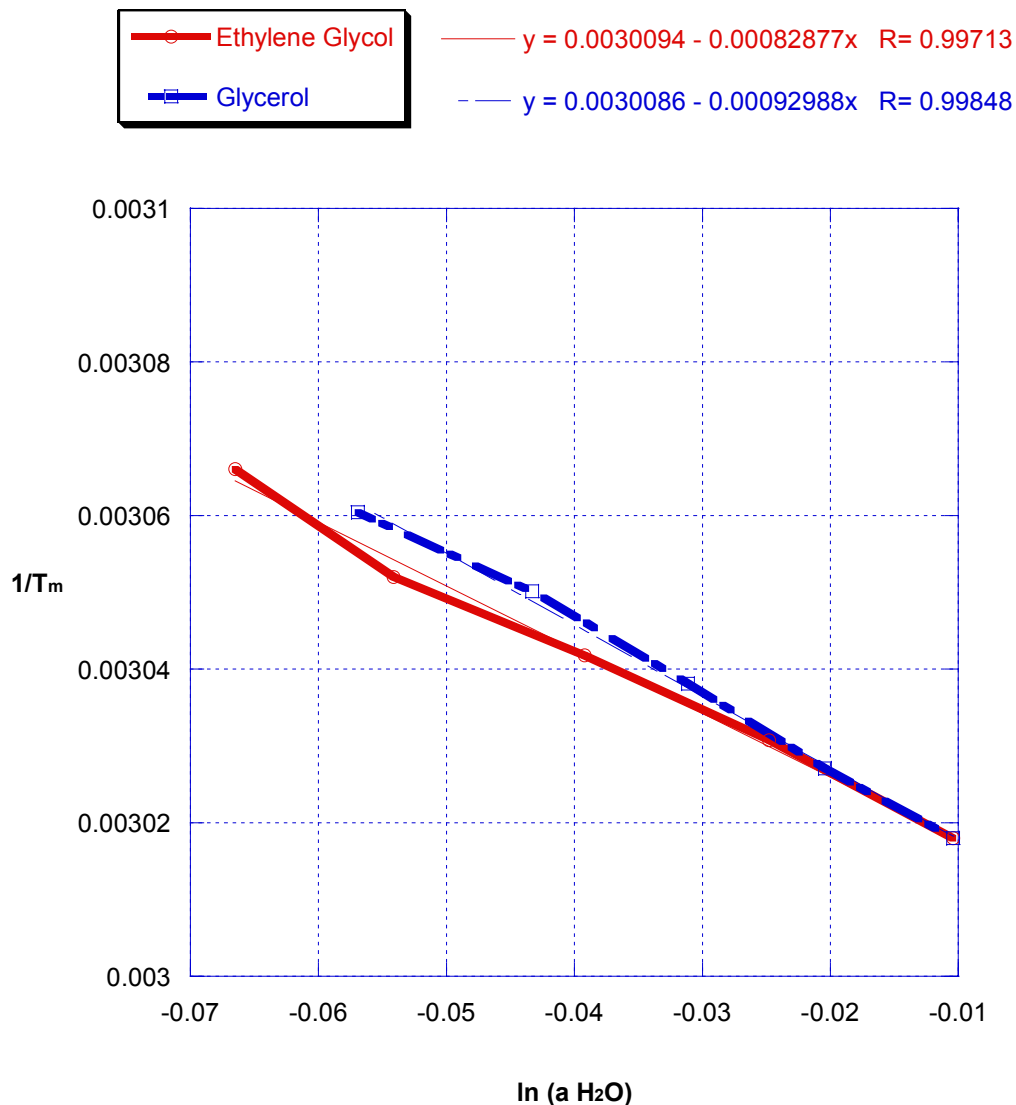

**Figure 5.** Reciprocal temperature of melting for r(CGCGAAUUAGCG) vs. the logarithm of water activity for small cosolutes.

**Table 10.** Calculations for r(CGCGAAUUAGCG).

| Experiments | Cosolute        | $-\Delta H$<br>(cal/mol) | $-\sigma H$ (cal/mol) | -Slope     | $-\sigma$ Slope | $\Delta n_w$ | $\sigma n_w$ |
|-------------|-----------------|--------------------------|-----------------------|------------|-----------------|--------------|--------------|
| md115       | Ethylene Glycol | 50834                    | 2394                  | 0.00082877 | 0.000092390     | 21.2         | 2.6          |
| md116       | Glycerol        | 50834                    | 2394                  | 0.00092988 | 0.000110915     | 23.8         | 3.1          |
